# Supplementary material for: Co-differentiation and enrichment of corneal endothelial cells and keratocytes from human pluripotent stem cells
Source: Springer Nature journal article supplement (doi:10.1038/s41598-025-03509-3), 2025-05-28
Supplement: MOESM1 [file 41598_2025_3509_MOESM1_ESM.pdf]

# **Supplementary material**

## **1.1. Supplementary methods**

### **Supplementary method 1. Reverse transcription (RT)-PCR**

For RT-PCR, forward and reverse primers (Supplementary Table 2) were designed (OligoPerfect Designer, Invitrogen and Primer-BLAST 29) and used with DNA polymerase (DreamTaq DNA Polymerase, Cat# EP0702, Thermo Scientific) and dNTPs (dNTP Mix, Cat# R0241, Thermo Scientific) for gene amplification by PCR. The final PCR product was analyzed by agarose gel electrophoresis imaging (Gel Doc XR+, Bio-Rad with Image Lab Software) and comparing the PCR product size with a DNA ladder (GeneRuler 50 bp DNA Ladder, Cat# SM0371, Thermo Scientific).

## Supplementary figures

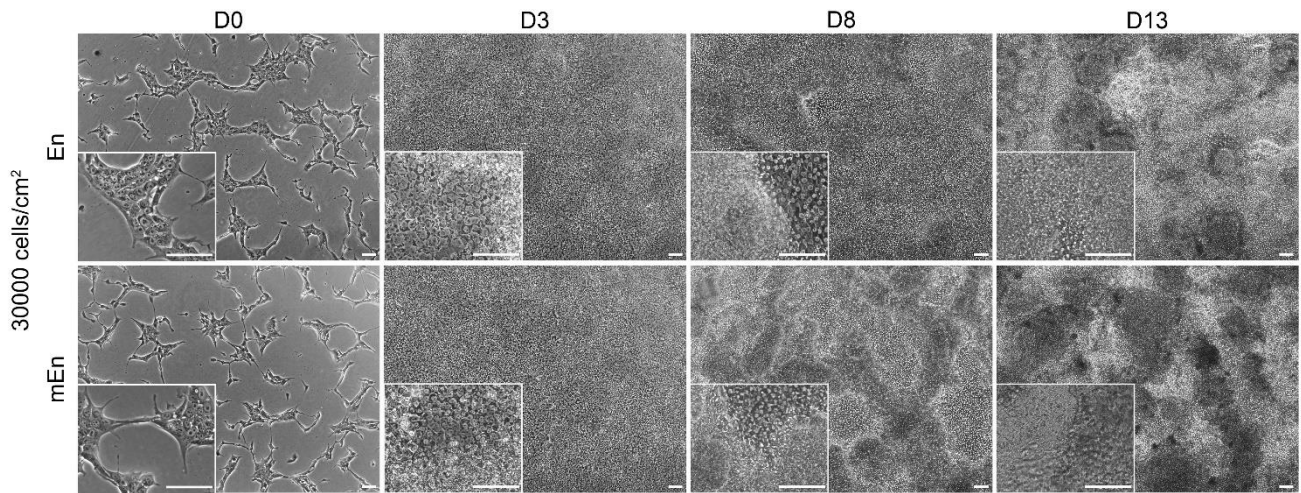

**Supplementary Figure 1.** Differentiation of hESC into CK-like cells with high seeding densities. Phase contrast image panel shows the hESC seeded at a density of 30000 cells/cm<sup>2</sup>. Cells were confluent by day (D) 3 with both En and mEn protocols. Cell clusters began to develop by D8 and increase by D13. Individual cell morphologies were however not very clear in the cell clusters and only few areas showed polygonal CEnC. Data shown is the representative images of the hESC differentiated to CK-like cells (n=3). Objective magnification: 4x and 10x. Scale bar: 100  $\mu$ m.

A hiPSC

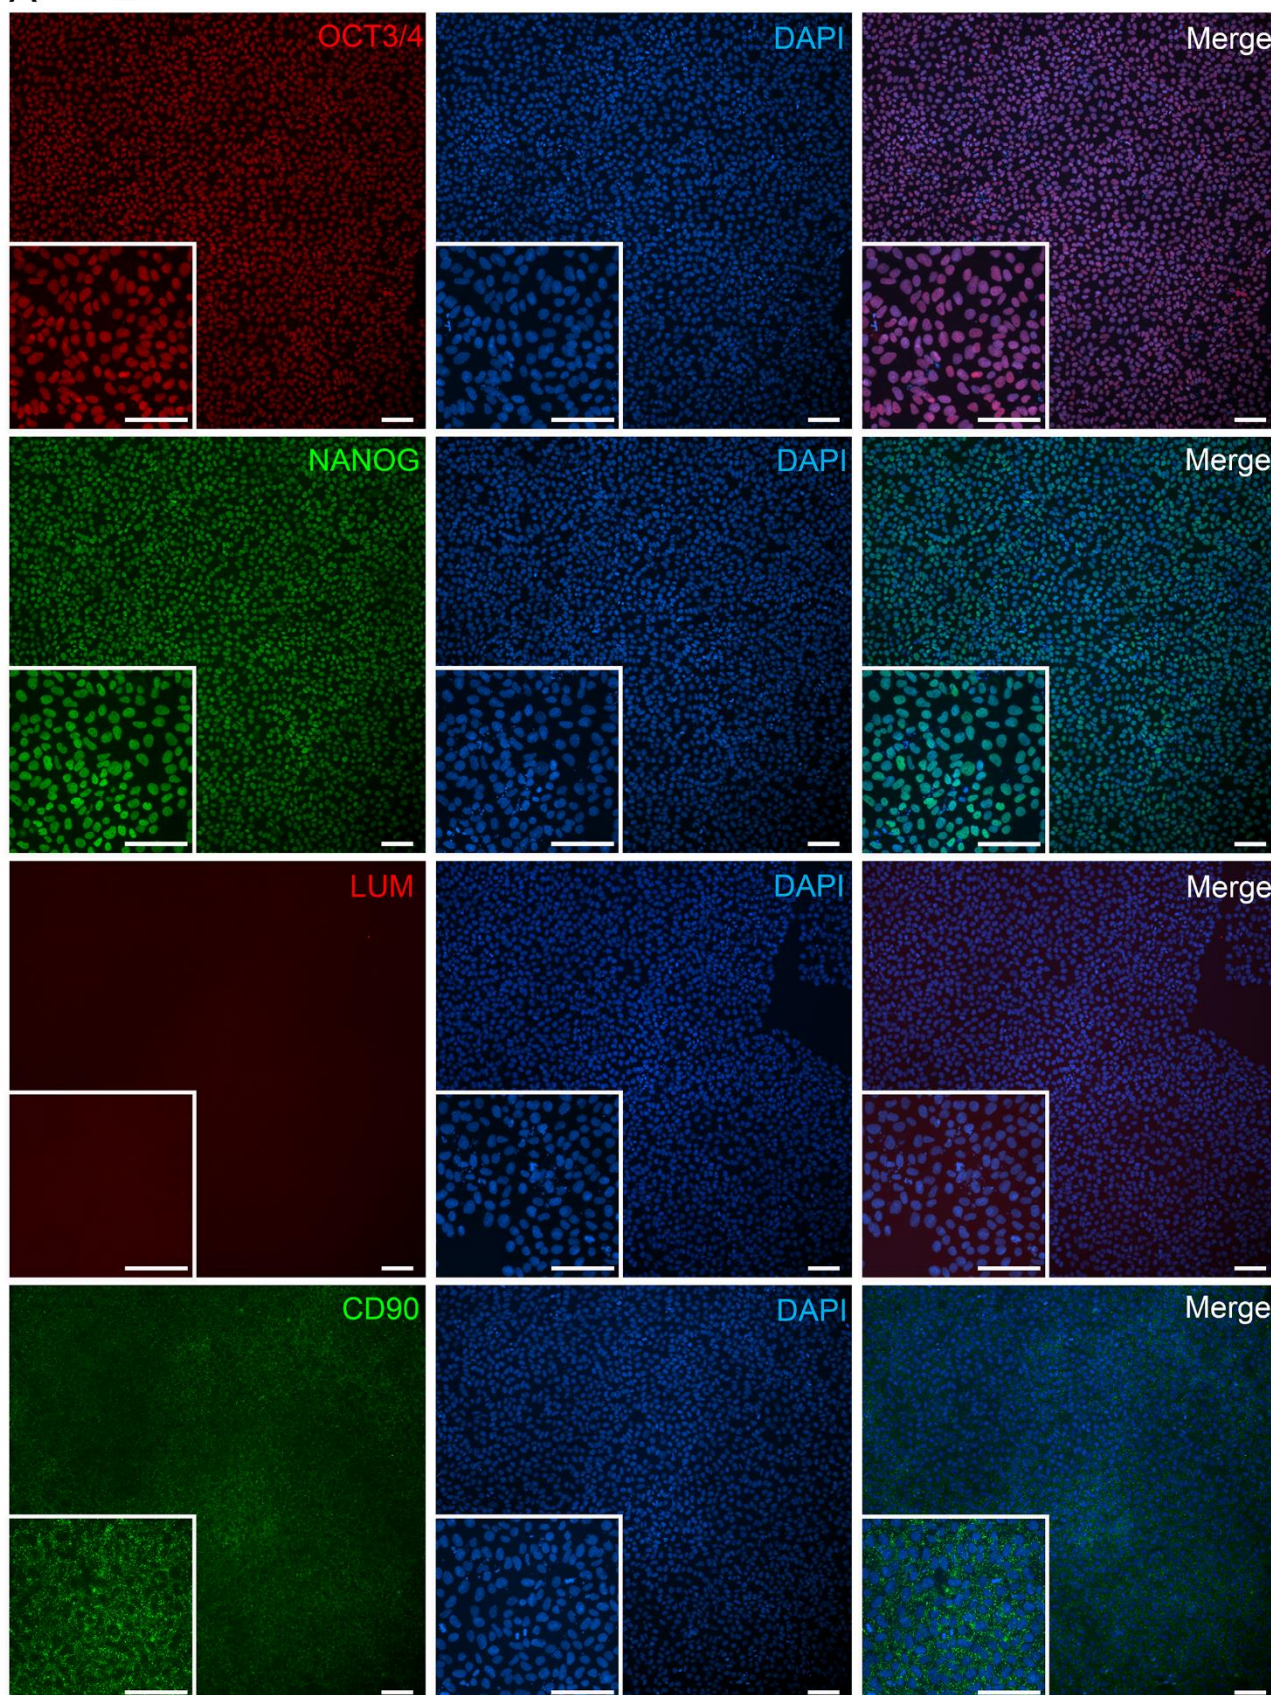



B hESC

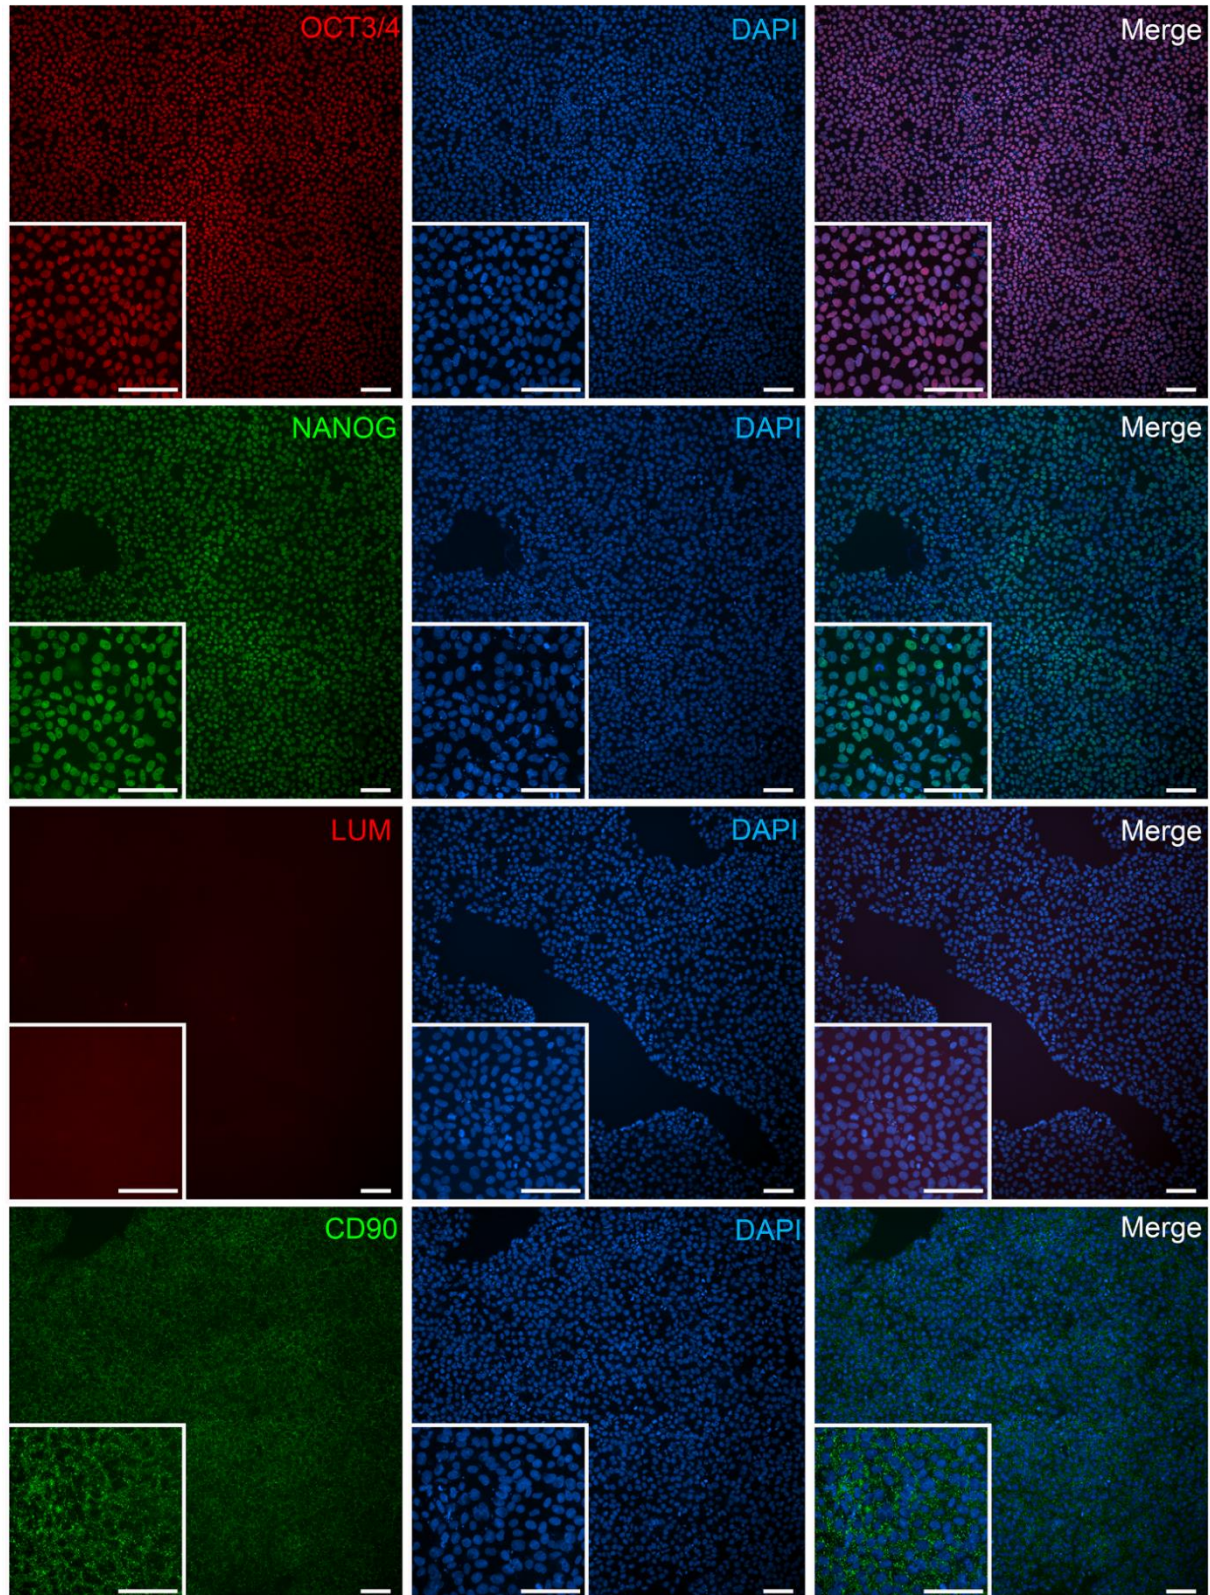

**Supplementary Figure 2.** Expression of CK markers in undifferentiated hPSC. Expression of OCT3/4 and Nanog in undifferentiated cells indicating the pluripotent stem cell characteristics in hiPSC (A) and hESC (B). Both cell types were CD90 positive and lumican (LUM) negative. Data shown is representative images of both hiPSC (WT001.TAU.bB) and hESC (n=3). Objective magnification: 10x and 20x. Scale bar: 100  $\mu$ m.



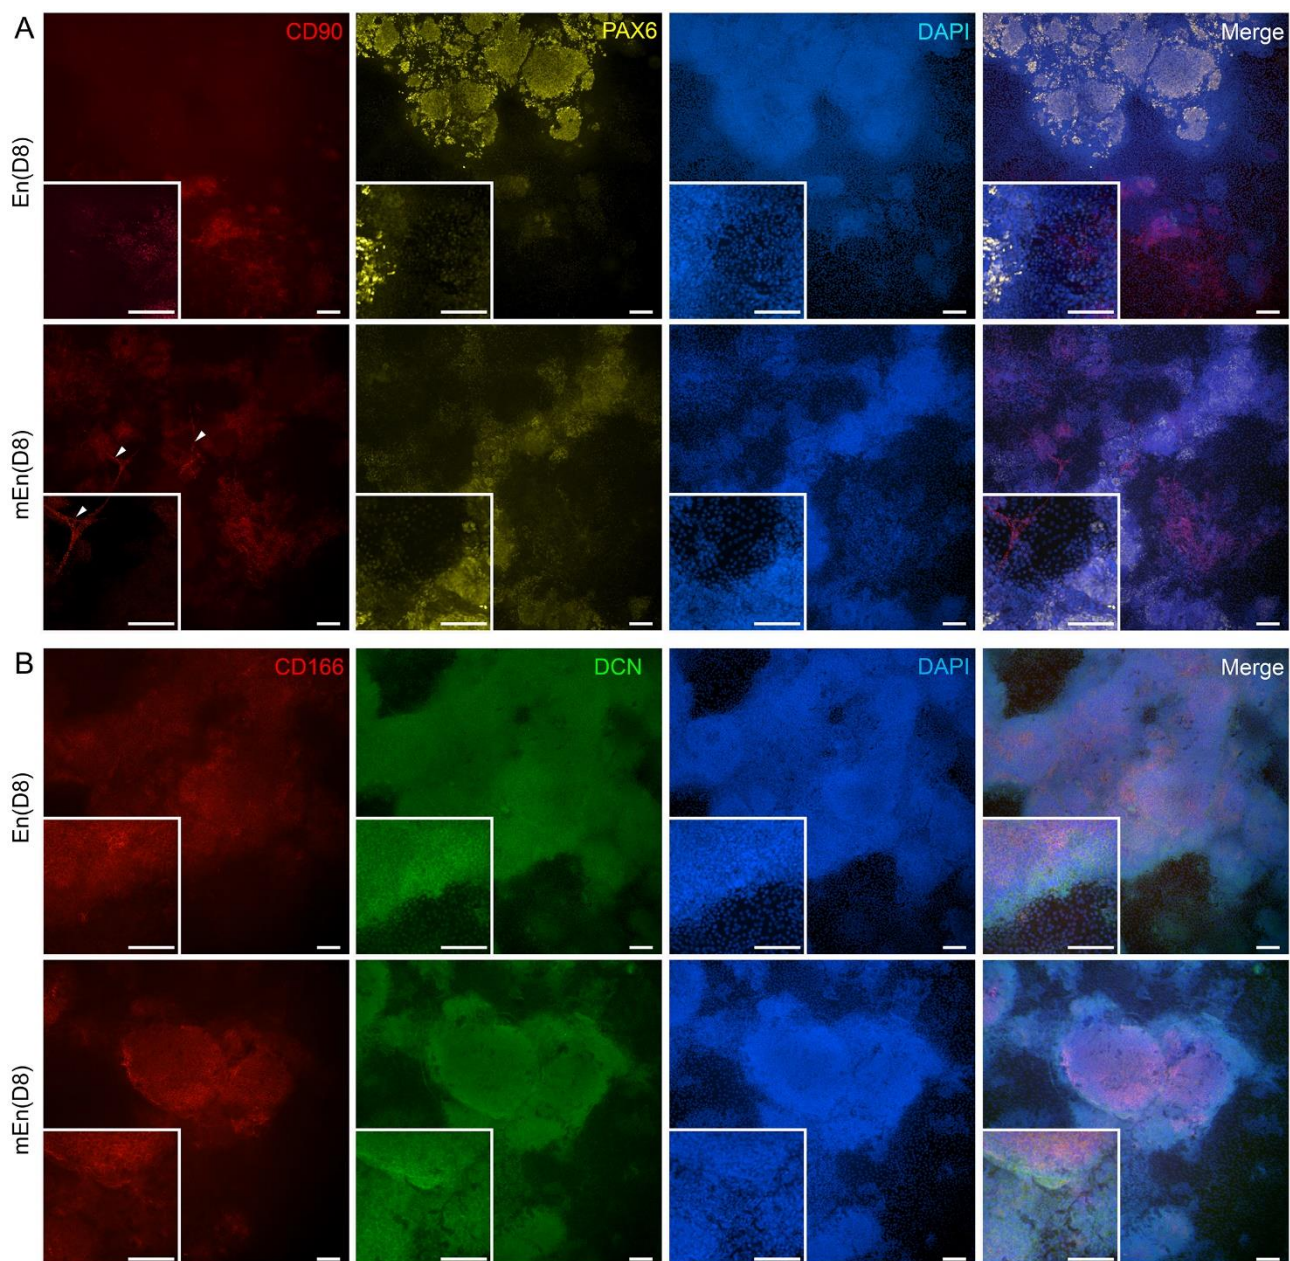



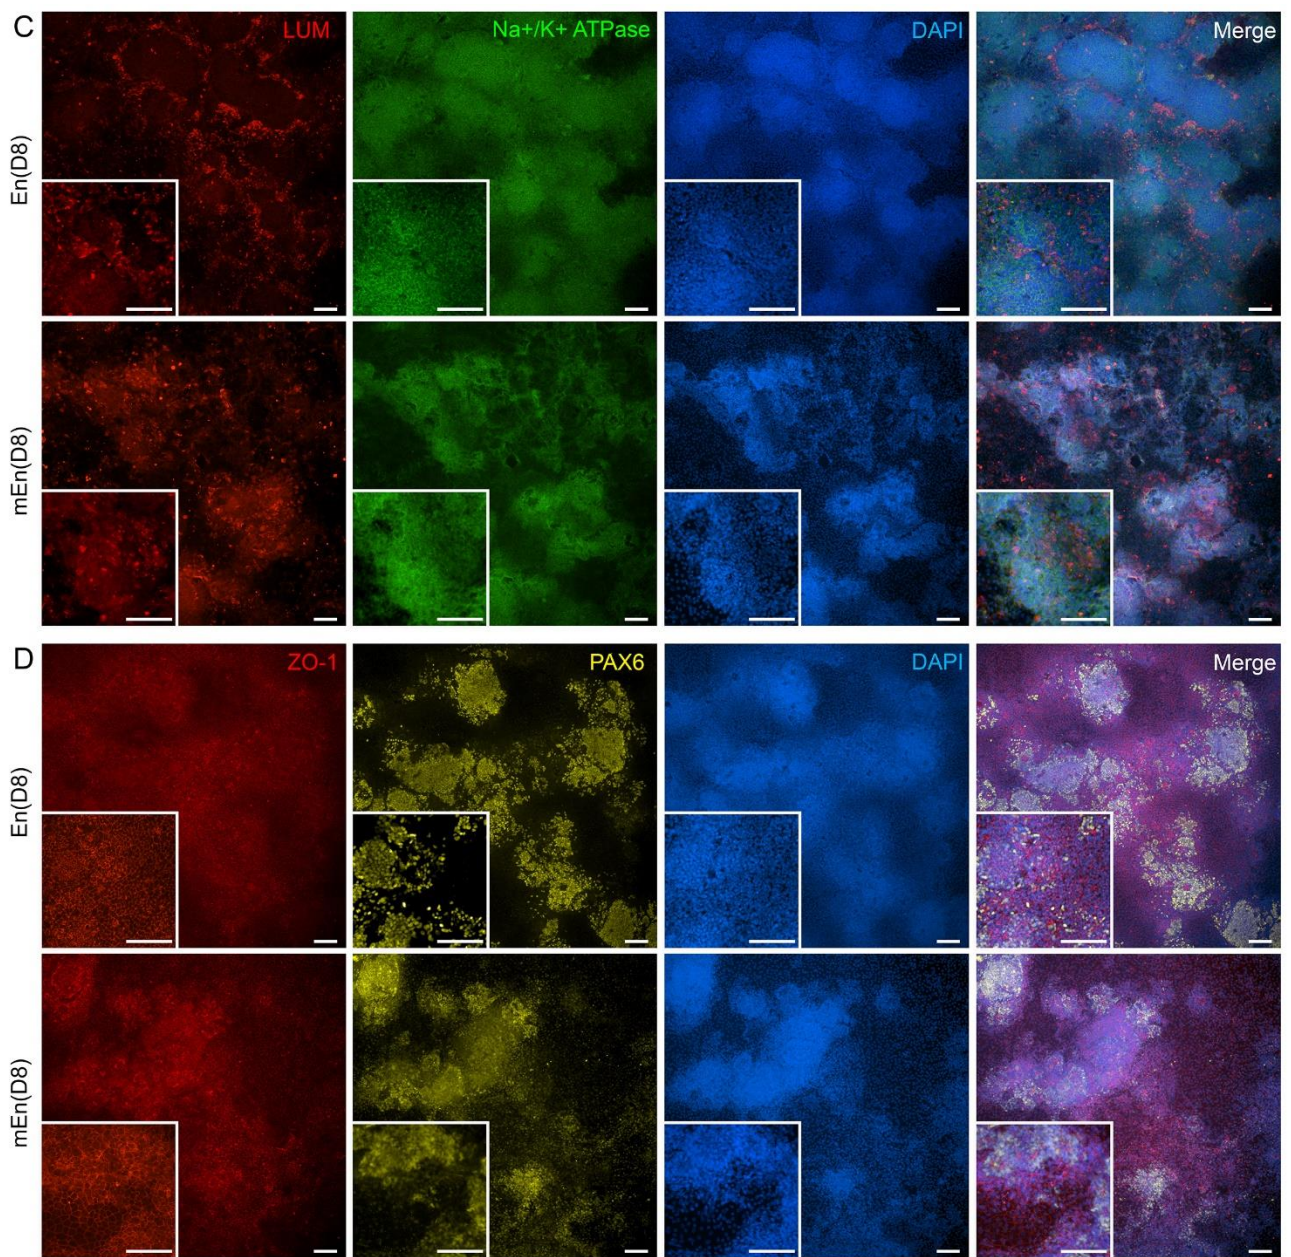



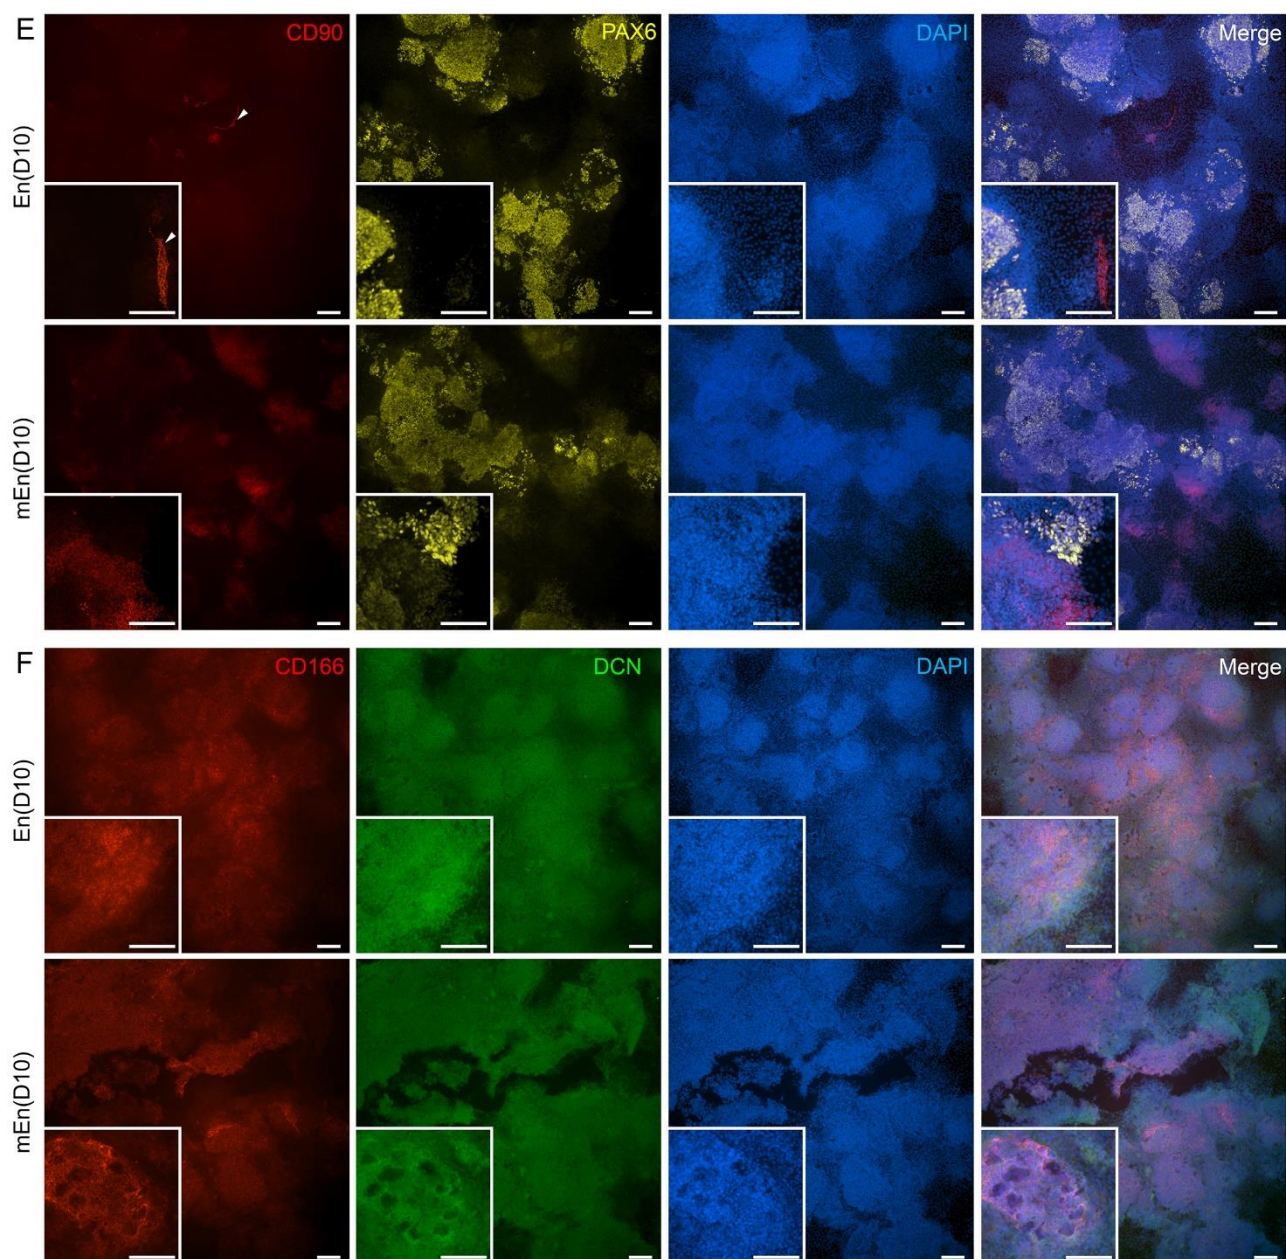



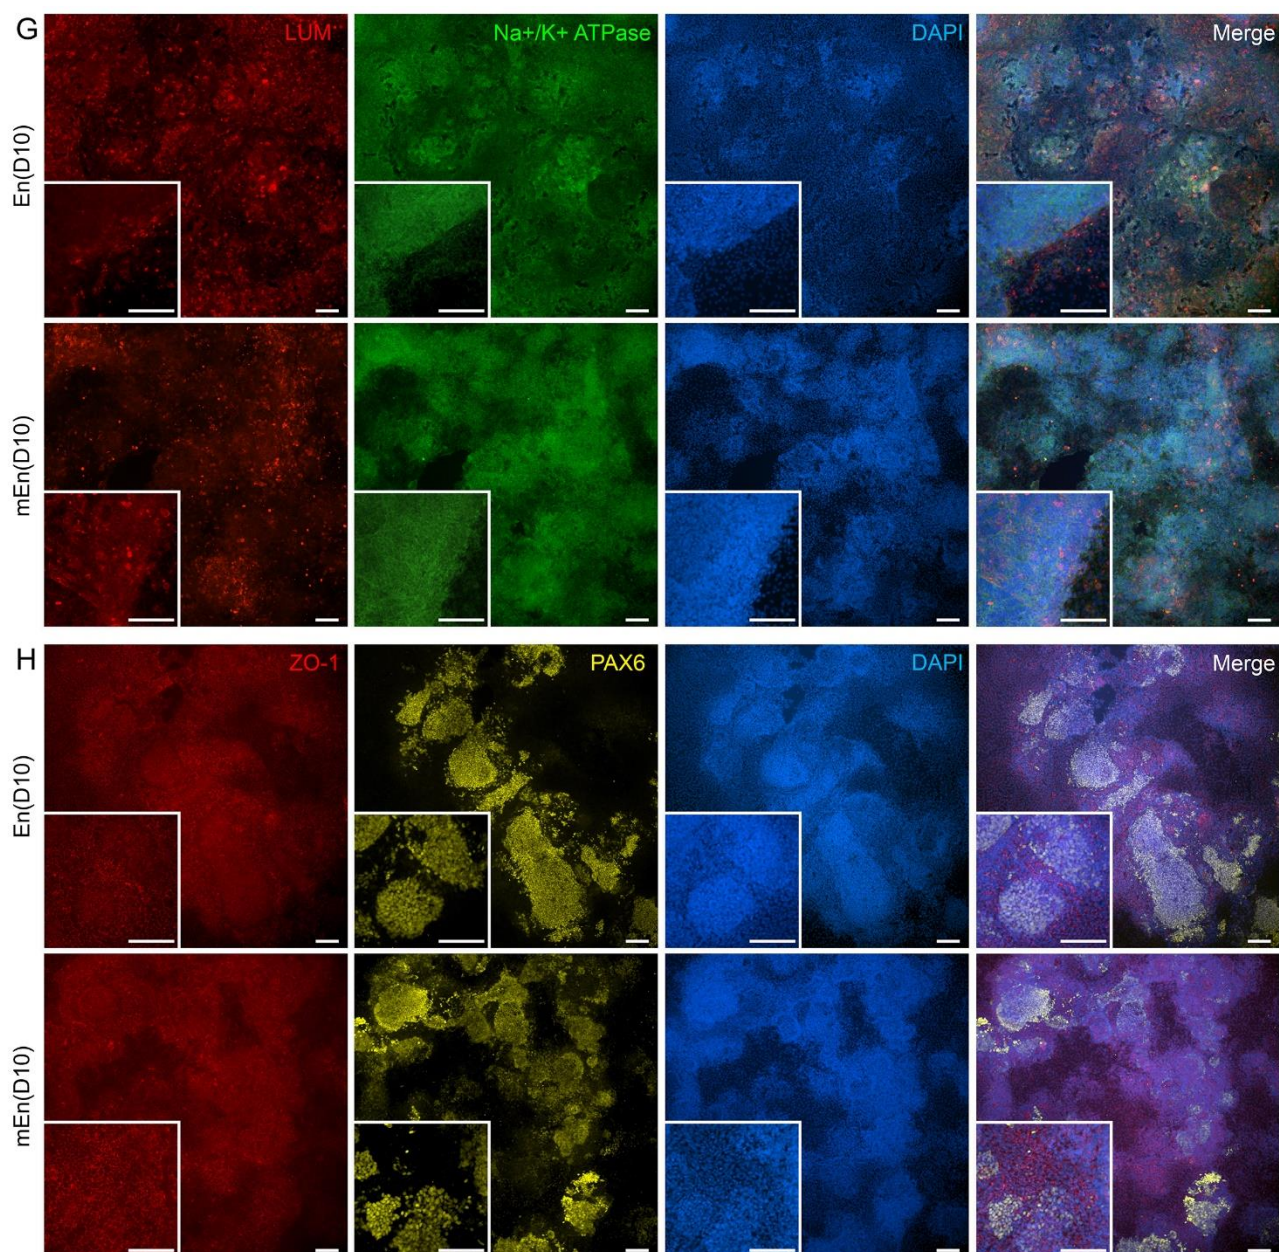

**Supplementary Figure 3.** Expression of CK and CEnC markers in hPSC differentiated CK-like cells. IF shows the expression of CD90 and PAX6 (A (D8) and E (D10)), CD166 and decorin (DCN) (B (D8) and F (D10)), lumican (LUM) and Na<sup>+</sup>/K<sup>+</sup>-ATPase (C (D8) and G (D10)) and ZO-1 and PAX6 (D (D8) and H (D10)) in both Endothelial (En) and modified endothelial protocols (mEn) after differentiation. Abundant expression of the proteoglycans (LUM and DCN) was observed. Additionally, CD90 was expressed in cells with fibroblastic morphology and ZO-1 have outlined the polygonal morphology of the cells indicating CEnC. Data shown is representative images of the hiPSC (WT001.TAU.bB) differentiated to CK-like cells (n=4) with two technical replicates in each. White arrow heads indicate cells with fibroblast-like morphology. Objective magnification: 10x and 20x. Scale bar: 100  $\mu$ m.



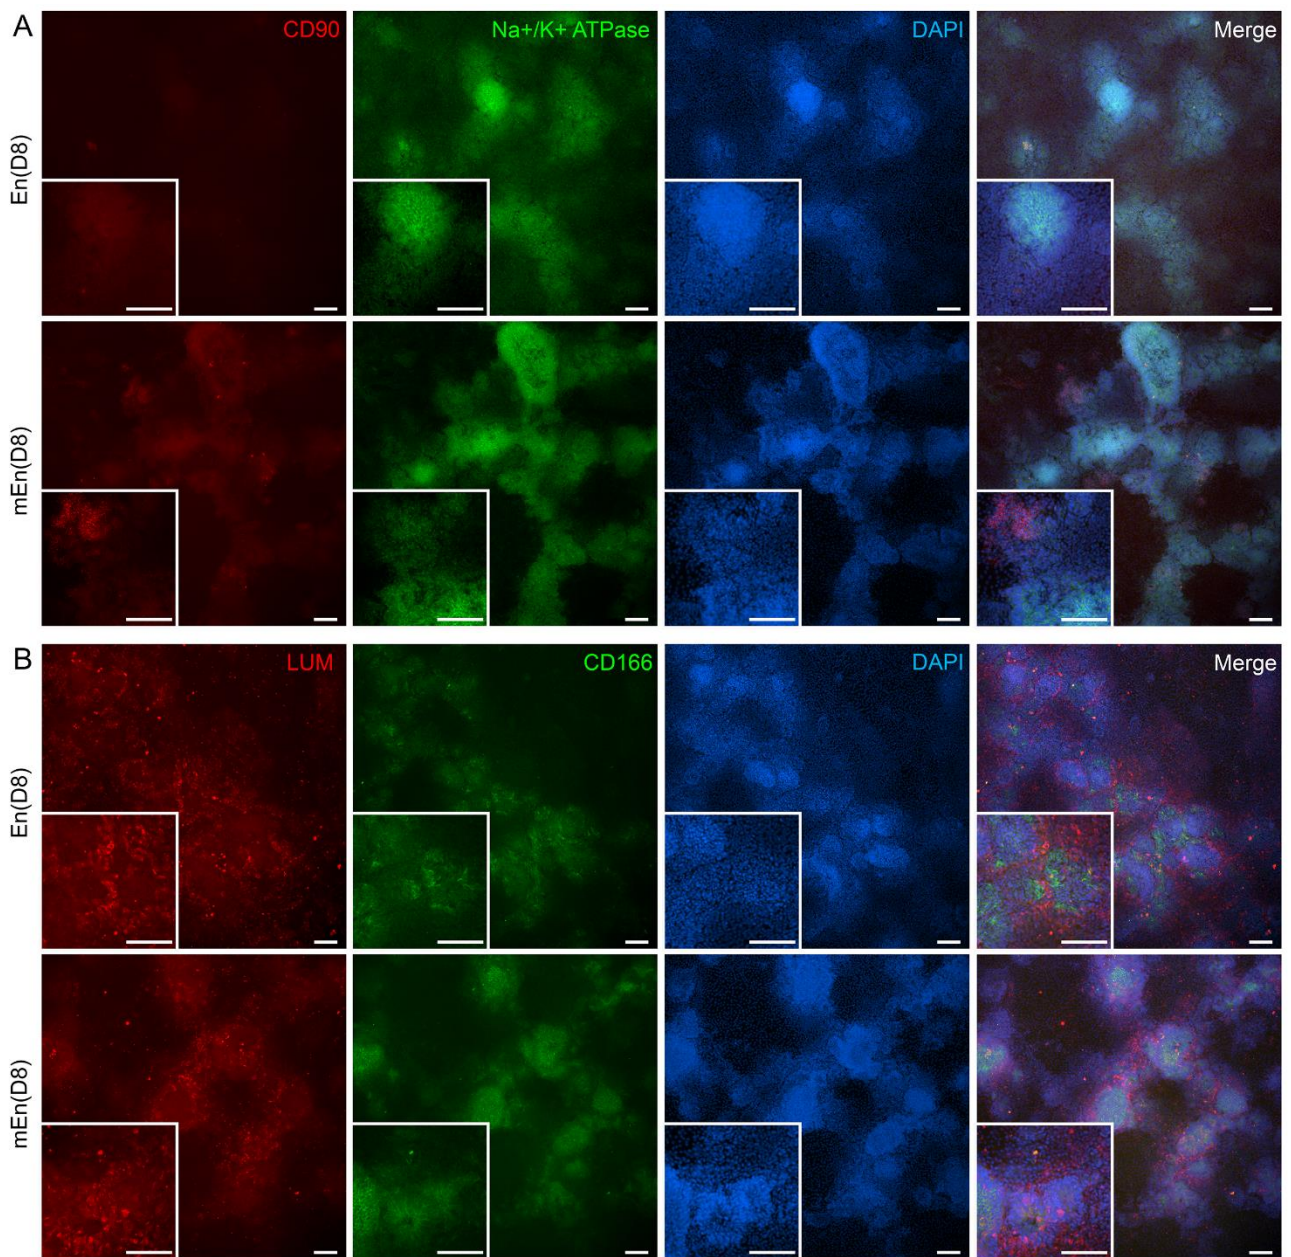



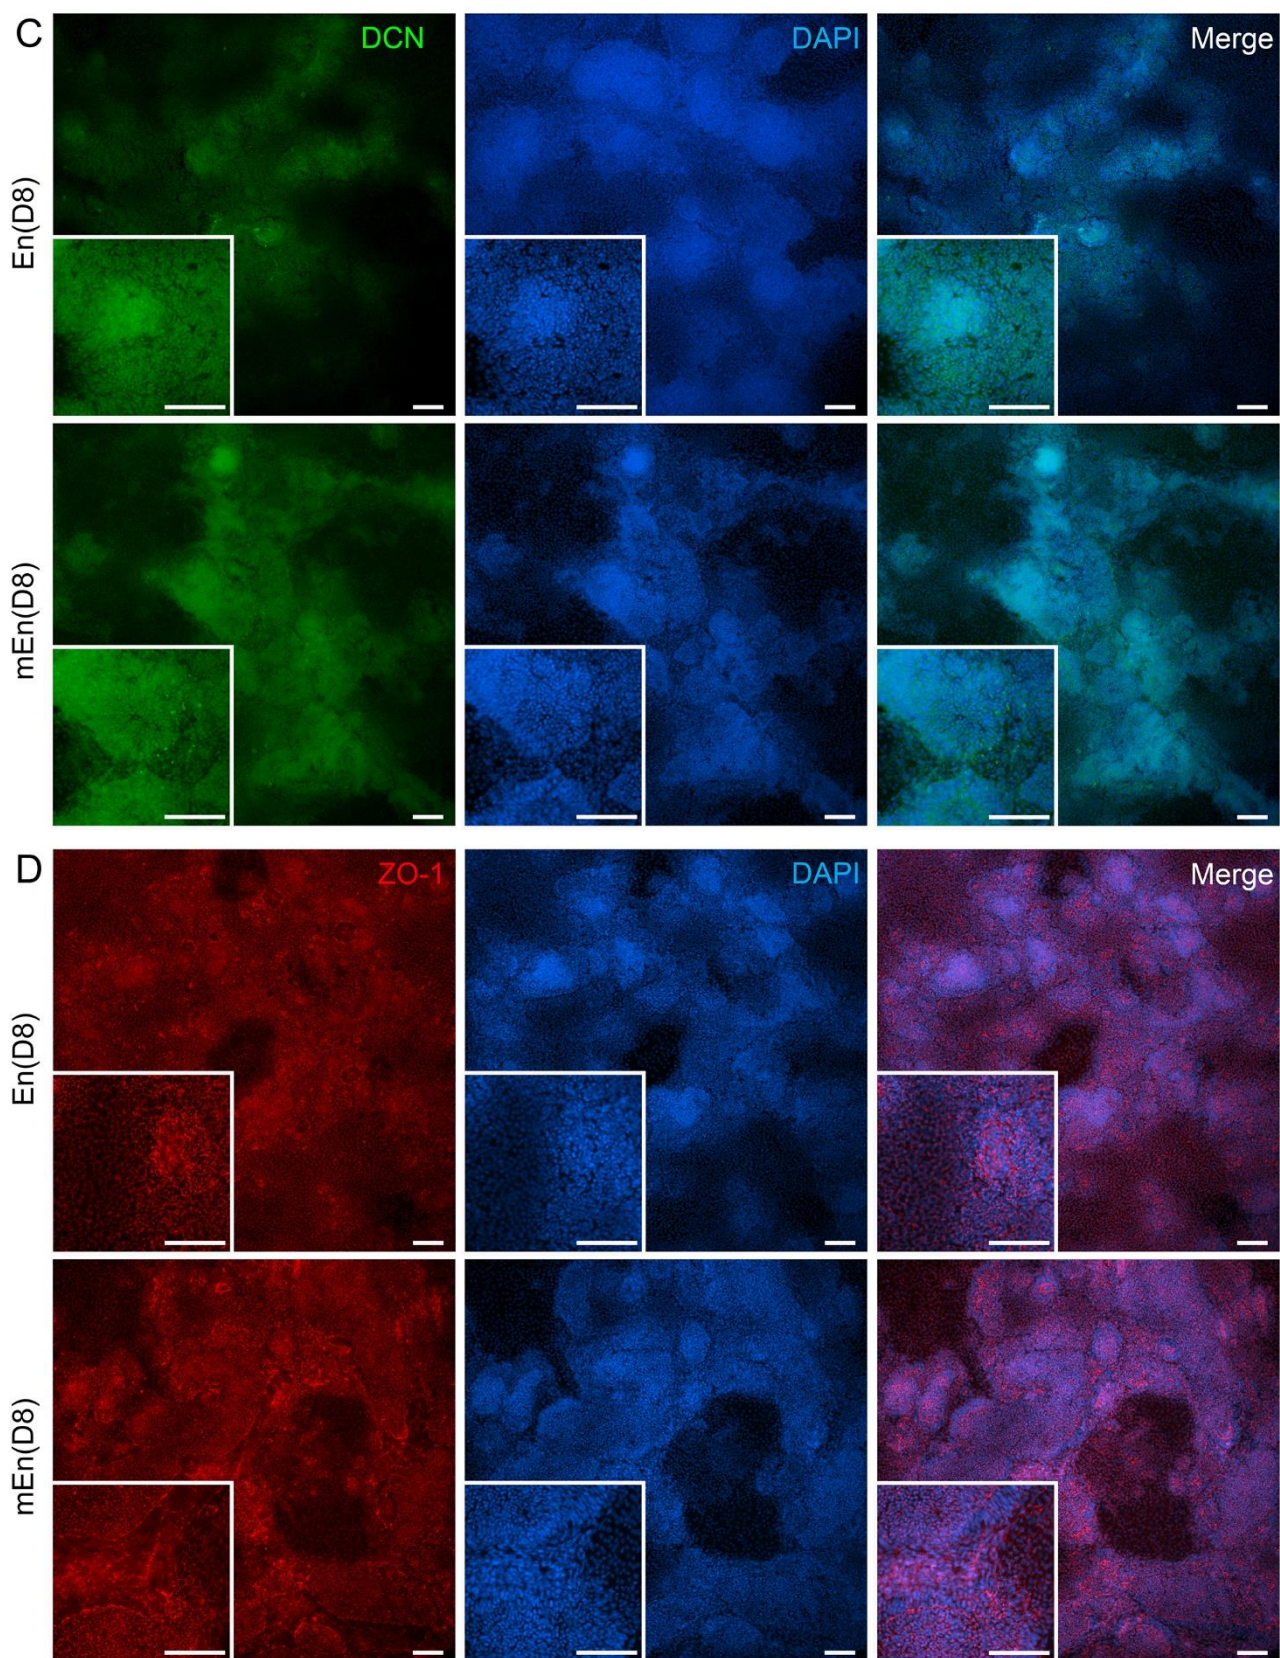



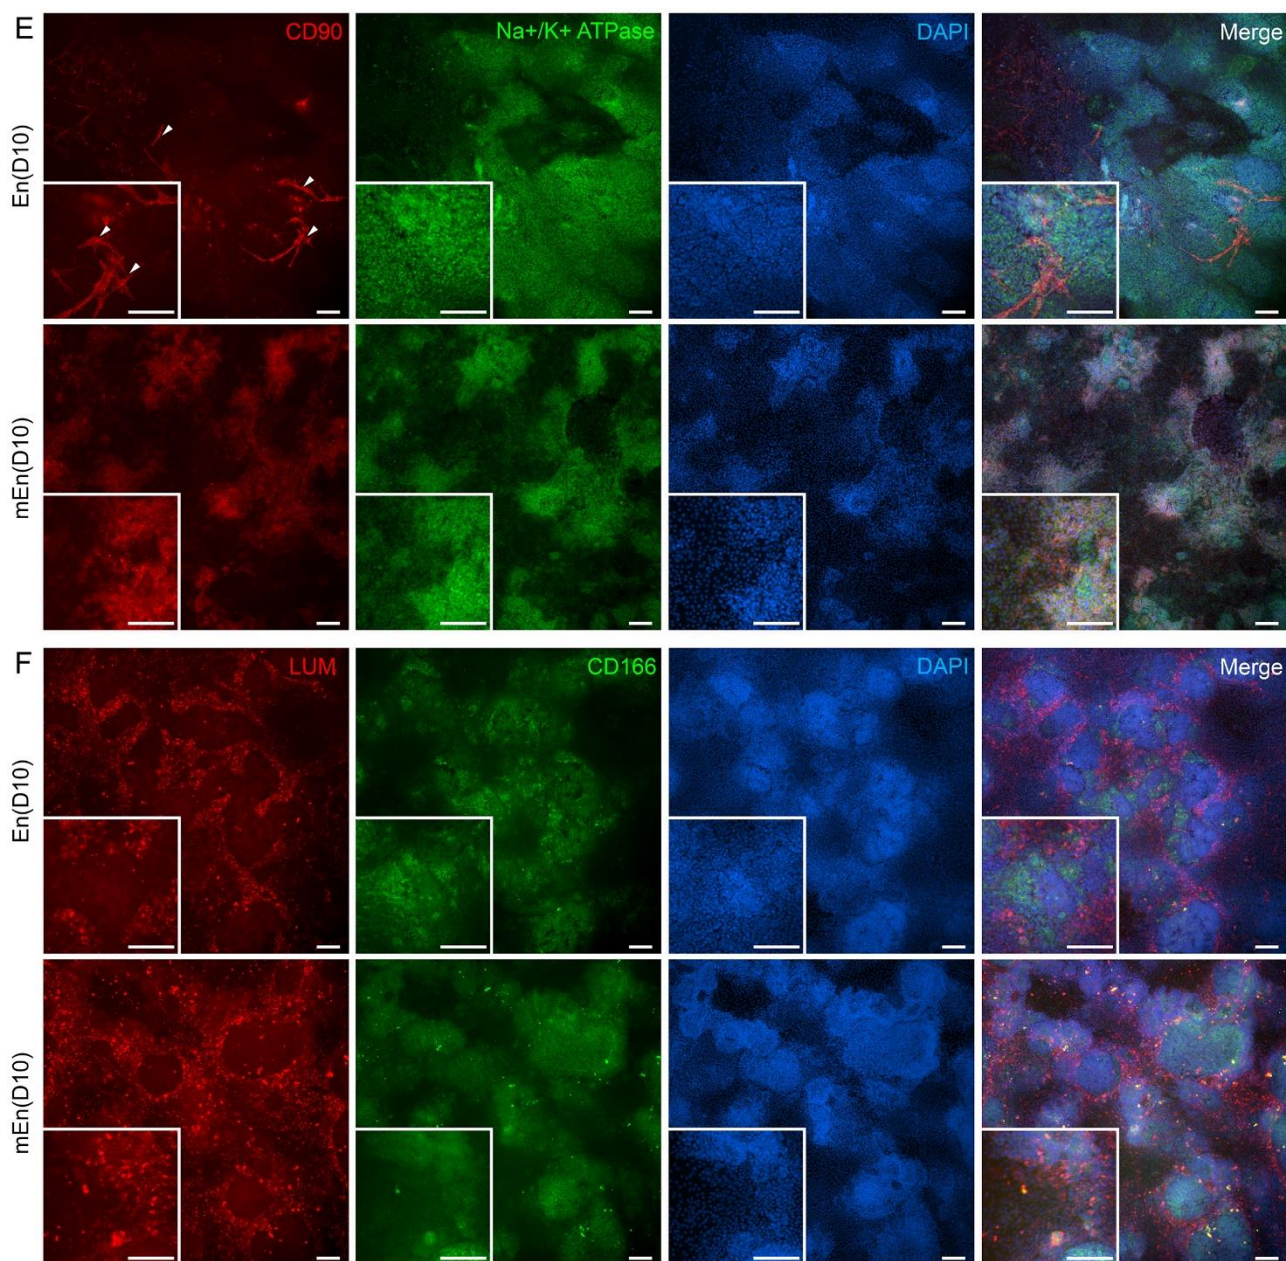



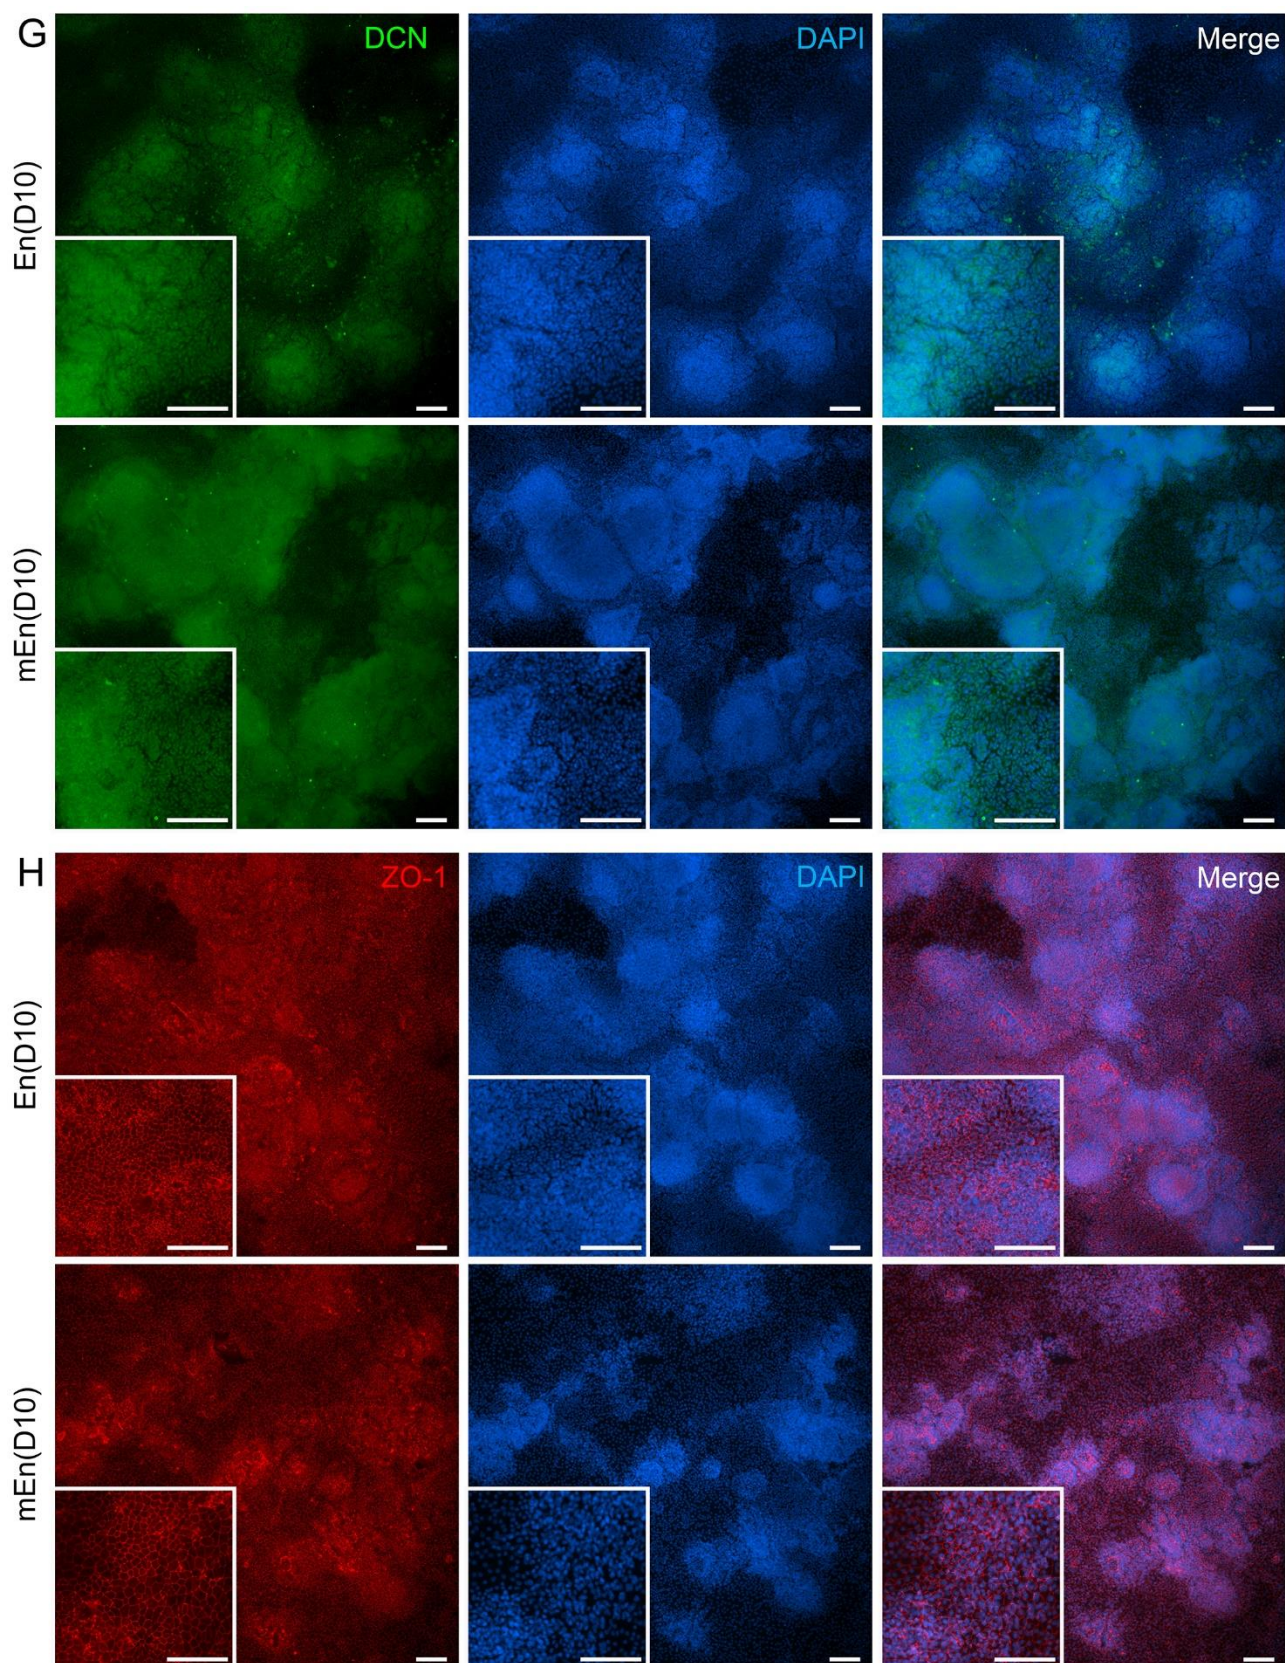



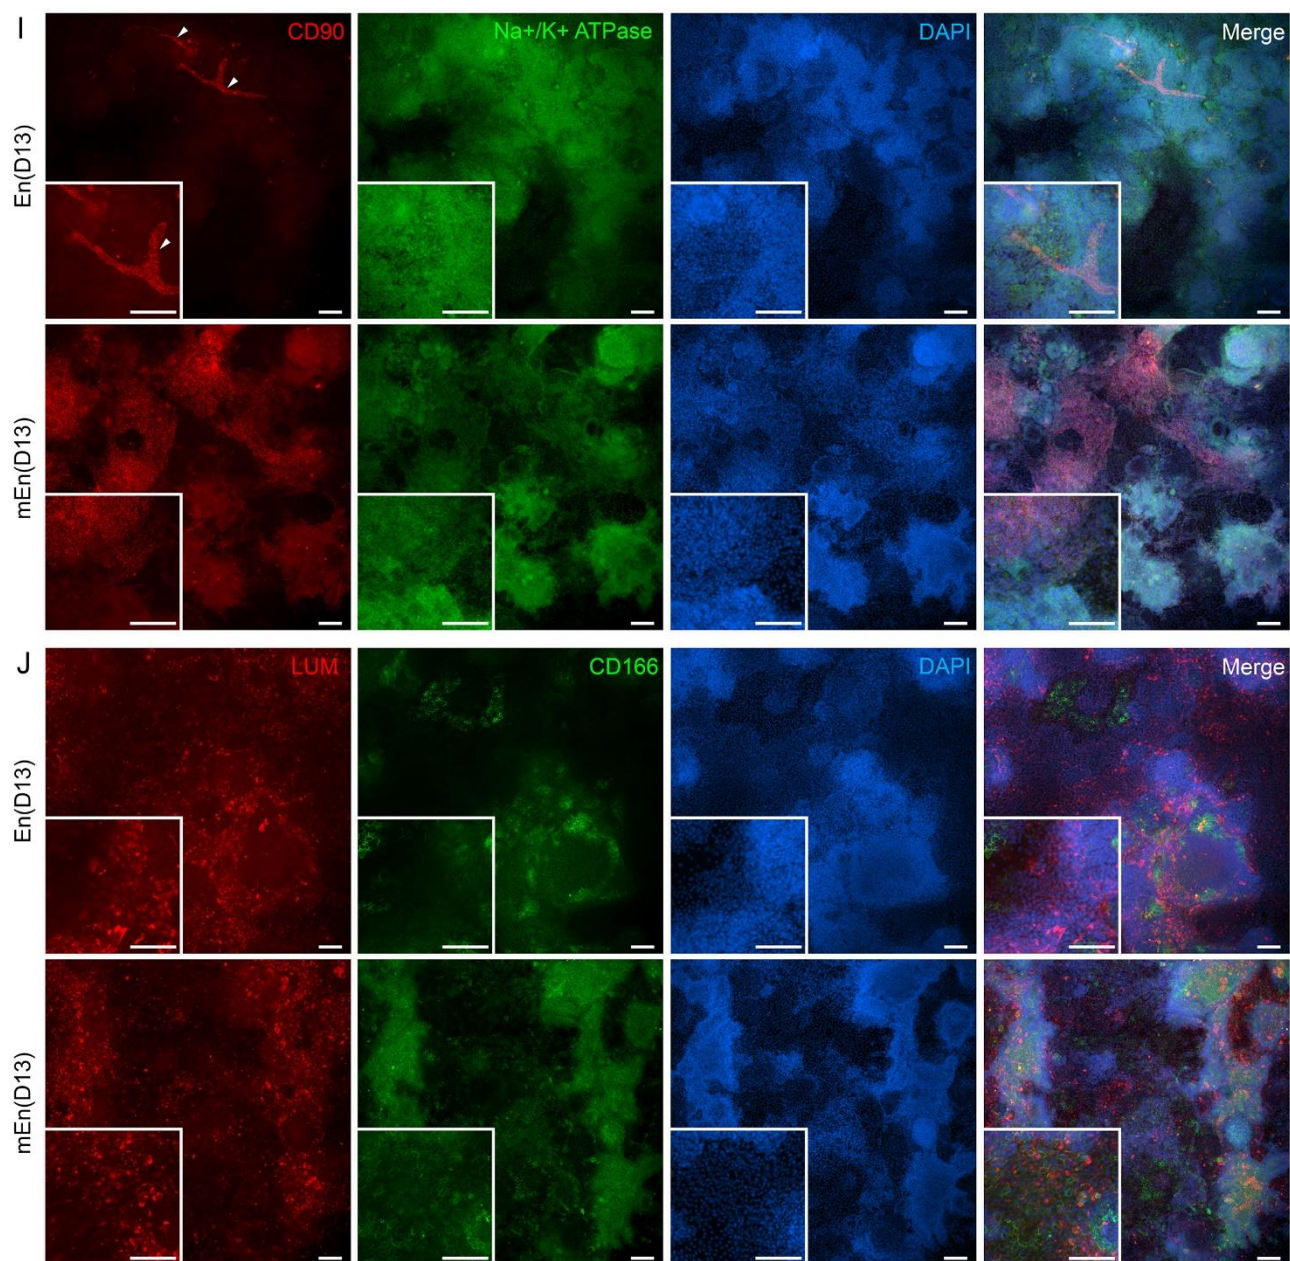



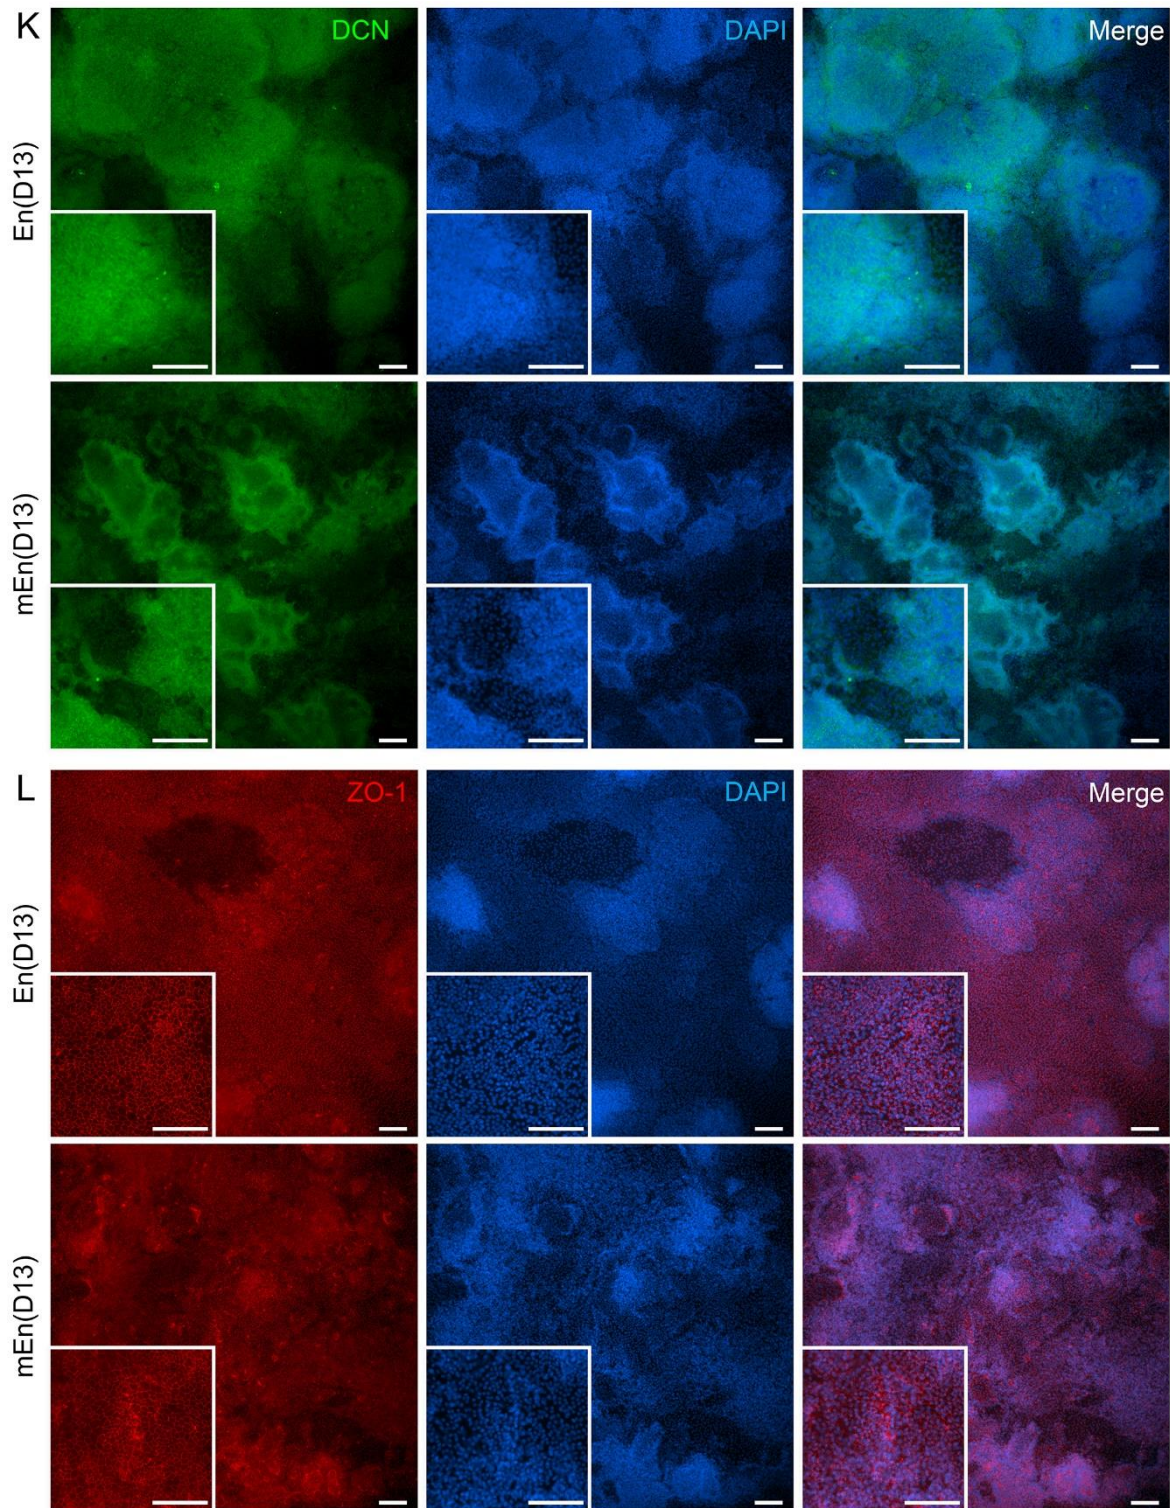

**Supplementary Figure 4.** Expression of CK and CEnC markers in hESC differentiated CK-like cells. IF shows the expression of CD90 and Na<sup>+</sup>/K<sup>+</sup>-ATPase (A (D8), E (D10) and I (D13)), lumican (LUM) and CD166 (B (D8), F (D10) and J (D13)), decorin (DCN) (C (D8), G (D10) and K (D13)), and ZO-1 (D (D8), H (D10) and L (D13)) in both En and mEn protocols after differentiation. Abundant expression of the proteoglycans (LUM and DCN) was observed. Additionally, CD90 was expressed in cells with fibroblastic morphology and ZO-1 have outlined the polygonal morphology of the cells indicating CEnC. Data shown is representative images of the hESC differentiated to CK-like cells (n=3). White arrow heads indicate cells with fibroblast-like morphology. Objective magnification: 10x and 20x. Scale bar: 100  $\mu$ m.



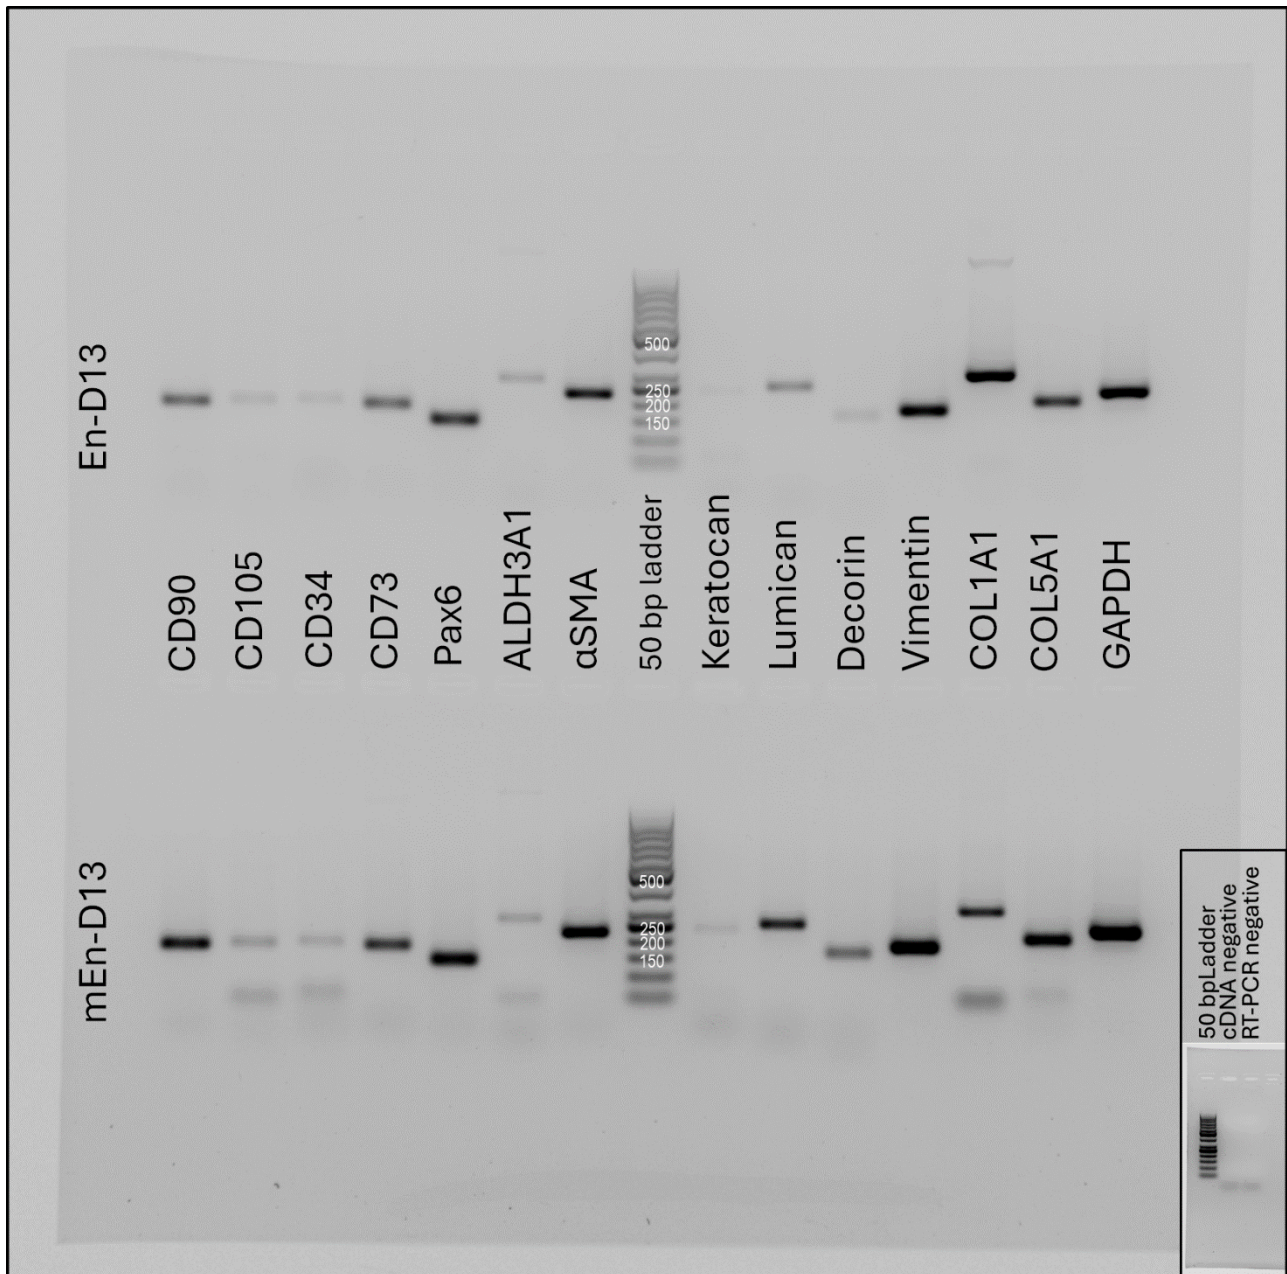

**Supplementary Figure 5.** Screening of corneal stromal cell related genes in hPSC-CK by semi-quantitative gene expression. Representative image showing the corneal stromal/CK-specific genes expressed in hiPSC-CK-like cells at day (D)13 in both endothelial (En) and modified endothelial (mEn) protocols. Image shown here is a single agarose gel (15 x 15 cm) with two rows of wells (15 wells per row) containing PCR products and an inset image from another gel showing negative controls. Picture was obtained with a gel document imager (Gel Doc XR+, Bio-Rad with Image Lab Software) at 0.01 second exposure. White markings represent the band size of the reference ladder used for identifying the specific size of the PCR products in the agarose gel. Inset image is obtained at 0.1 second exposure (with cropped empty wells to right) showing no band in the negative control of cDNA preparation and RT-PCR samples. Data shown is representative image of the hiPSC (WT001.TAU.bB) differentiated to CK-like cells (n=3).



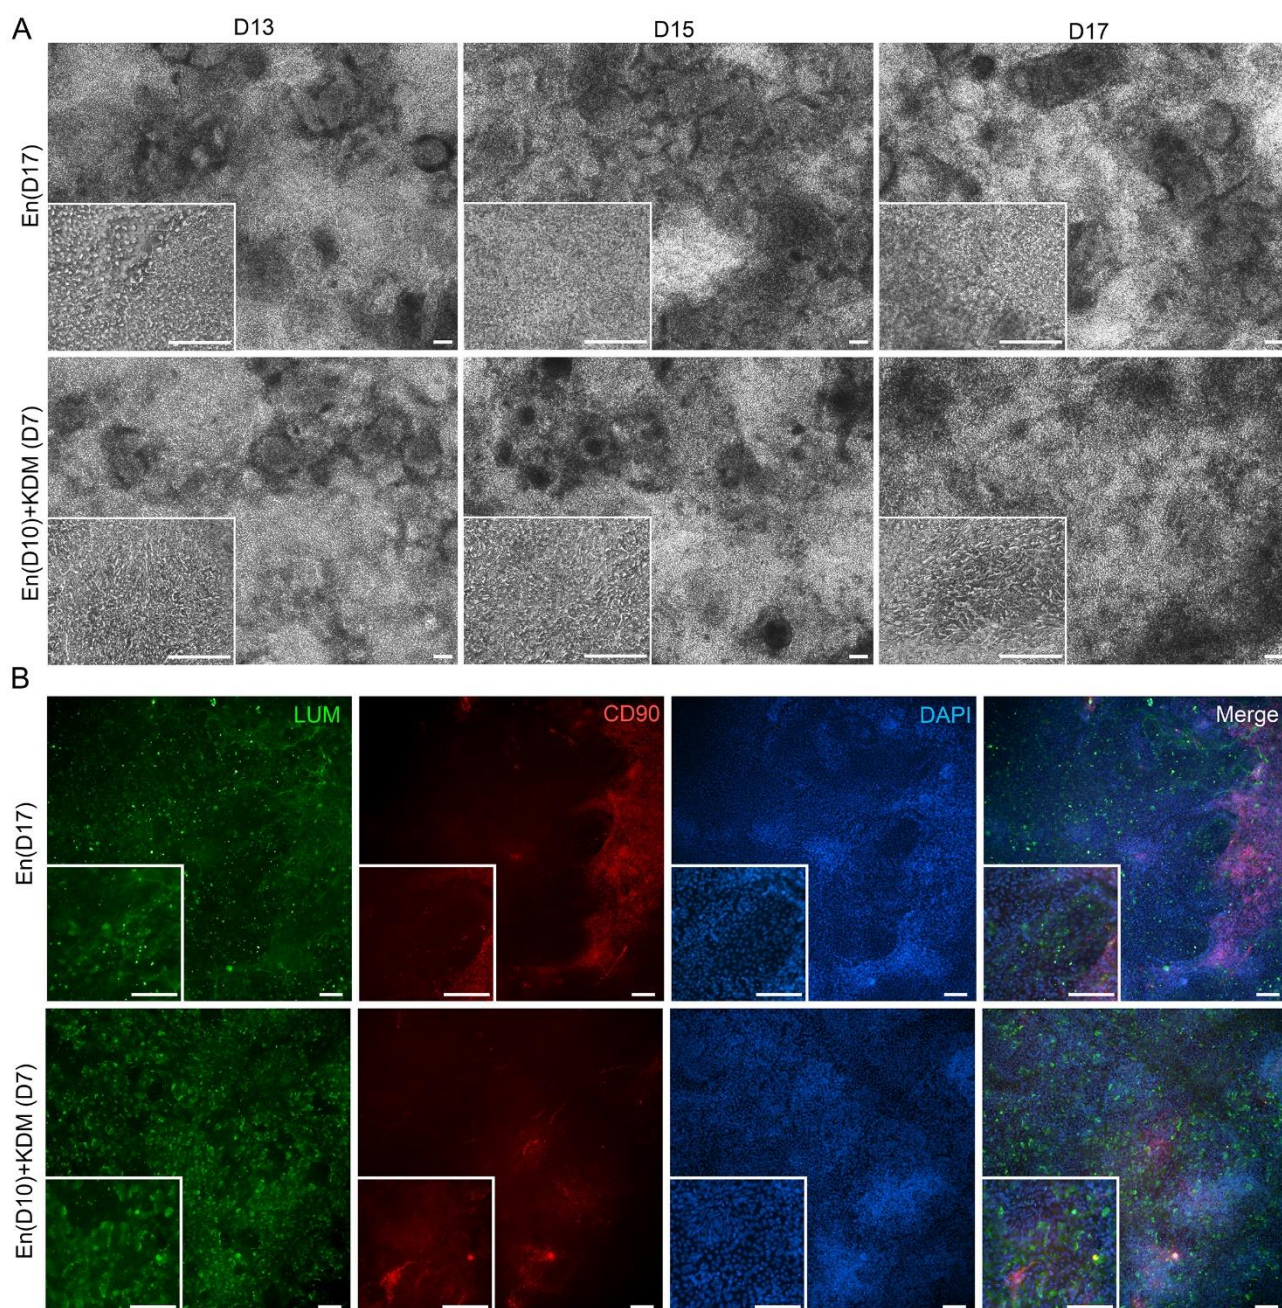

**Supplementary Figure 6.** Differentiation cultures of hPSC-CK. En (D17) represents continuous cultures of hPSC-CK until day (D) 17. En (D10) + KDM (D7) represents En cultures until D10 and then switched to keratocyte differentiation medium (KDM) to culture for 7 more days. A) Phase contrast images of the hPSC-CK cultures demonstrates fibroblast-like morphology on D17 in KDM culture (inset image). B) IF shows the increased expression of lumican (LUM) and decreased CD90 in En-D10 + KDM-D7 compared to En-D17 indicating the influence of KDM on hPSC-CK characteristics. Data is the representative images of hiPSC (WT001.TAU.bB) differentiated to CK-like cells (n=2). Objective magnification: A) 4x and 10x. B) 10x and 20x. Scale bar: 100 μm.



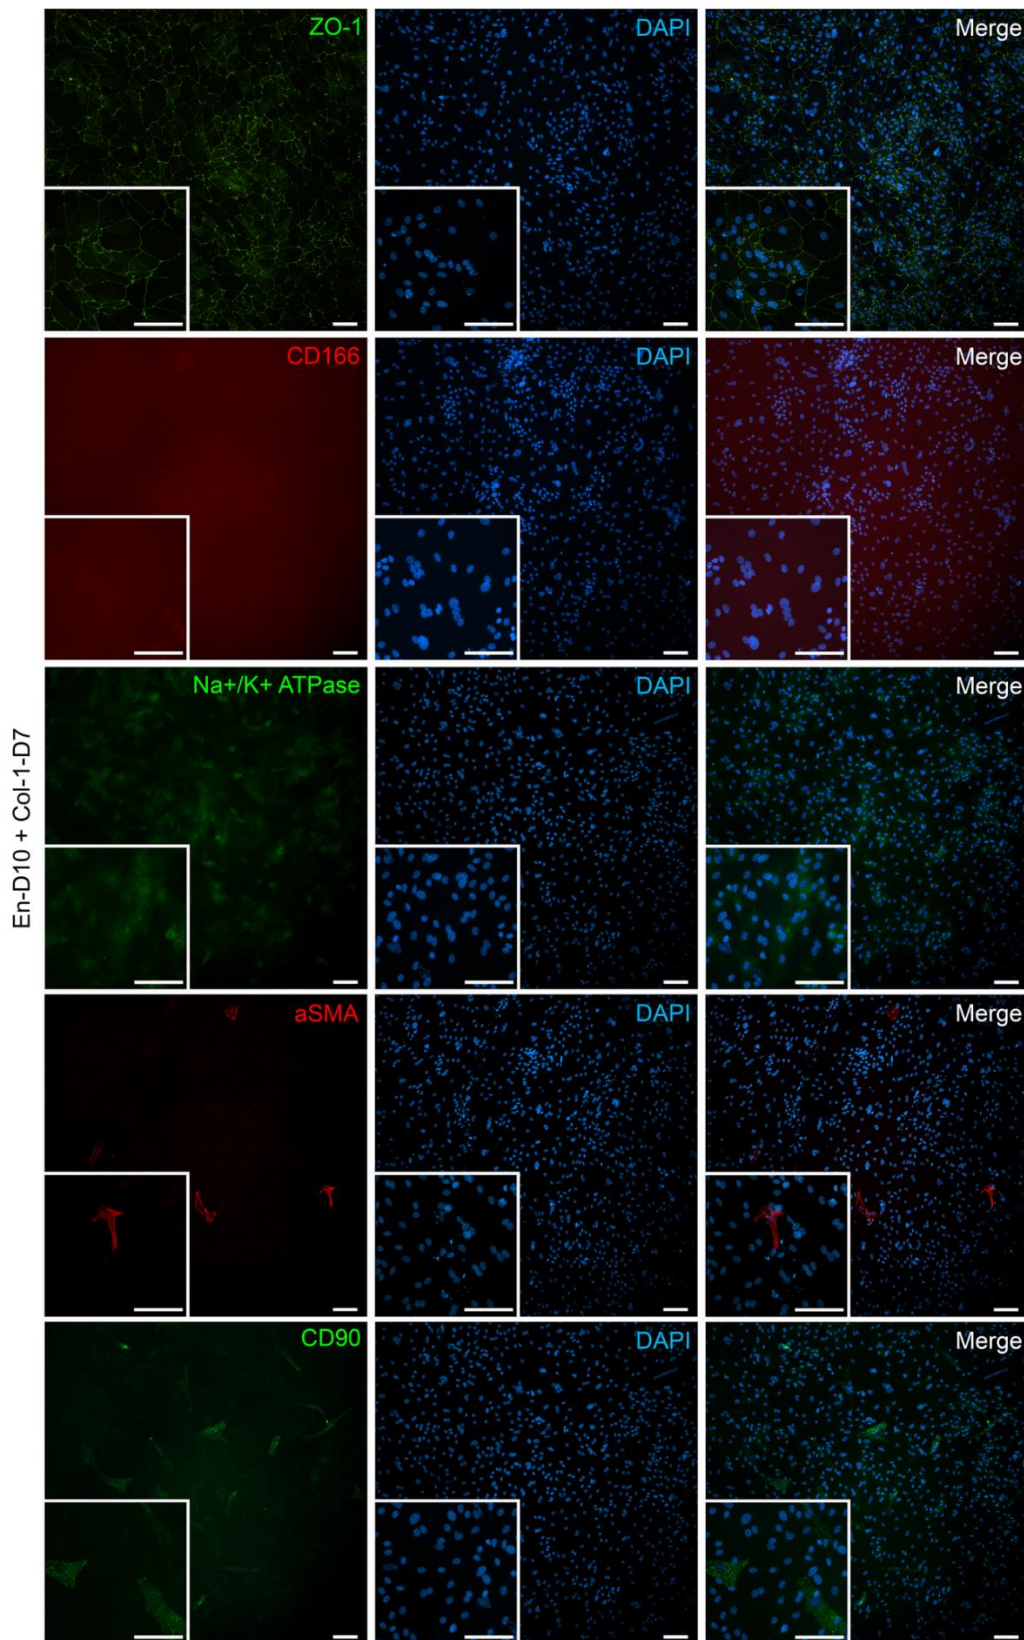

**Supplementary Figure 7.** Expression of Corneal stromal cell (CSC) or CEnC markers in enriched hPSC-CK. IF of hPSC-CK-like cells enriched on collagen-1 coated plates had minimal ZO1 expression (green) and  $\text{Na}^+/\text{K}^+$ -ATPase (green). Moreover, no CD166 expression was observed indicating the absence of CEnC phenotype. CSC markers CD90 (green) and alpha SMA (aSMA; red) was observed. Data is the representative images of hiPSC (WT001.TAU.bB) differentiated to CK-like cells (n=3). Objective magnification: 10x and 20x. Scale bar: 100  $\mu\text{m}$ .



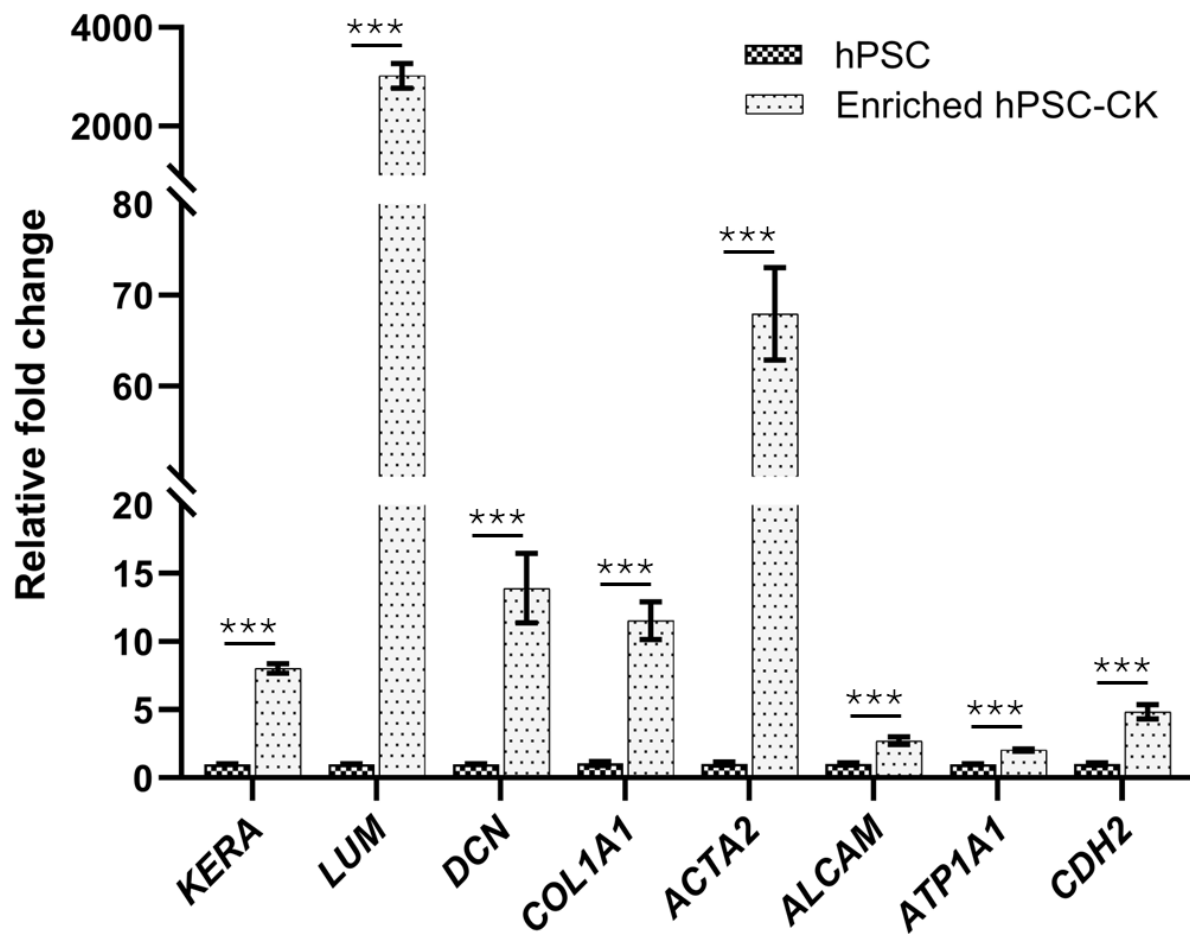

**Supplementary Figure 8.** Gene expression analyses of the enriched hPSC-CK-like cells compared to hPSC. Gene expression analysis of the enriched hPSC-CK-like cells cultured on hCOL1 plates showed significant increase in expression of all the genes. The relative fold changes of the analyzed genes (KERA:  $8.04 \pm 0.35$ ; LUM:  $3020.85 \pm 250$ ; DCN:  $13.91 \pm 2.55$ ; COL1A1:  $11.54 \pm 1.38$ ; ACTA2:  $67.95 \pm 5.09$ ; ALCAM:  $2.72 \pm 0.28$ ; ATP1A1:  $2.04 \pm 0.08$ ; CDH2:  $4.85 \pm 0.53$ ; PAX6:  $8.04 \pm 0.35$ ;) were highly significant ( $p \leq 0.001$ ) when compared to their expression in undifferentiated hPSC. Mann-Whitney U test was performed to compare the ranks among the groups of a gene. Significant relative fold change was indicated as \*\*\* -  $p \leq 0.001$ . Data is represented as the mean relative fold changes of the gene with standard error in hiPSC (WT001.TAU.bB) differentiated to CK-like cells ( $n=3$ ).



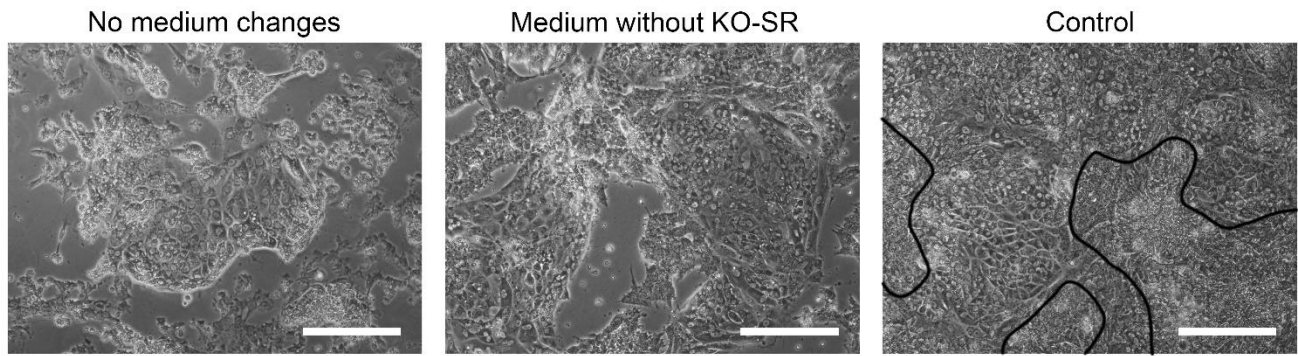

**Supplementary Figure 9.** Starvation methods without medium changes and medium without KO-SR compared to control. No major differences were observed between the two starvation methods, both reduced the mesenchymal-like cell structures which can be seen in control culture, where medium was changed normally. Black marker profiles the mesenchymal-like structures. Data shown is representative images of the hESC differentiated to CEnC-like cells (n=3). Objective magnification: 10x. Scale bars 200  $\mu\text{m}$ .

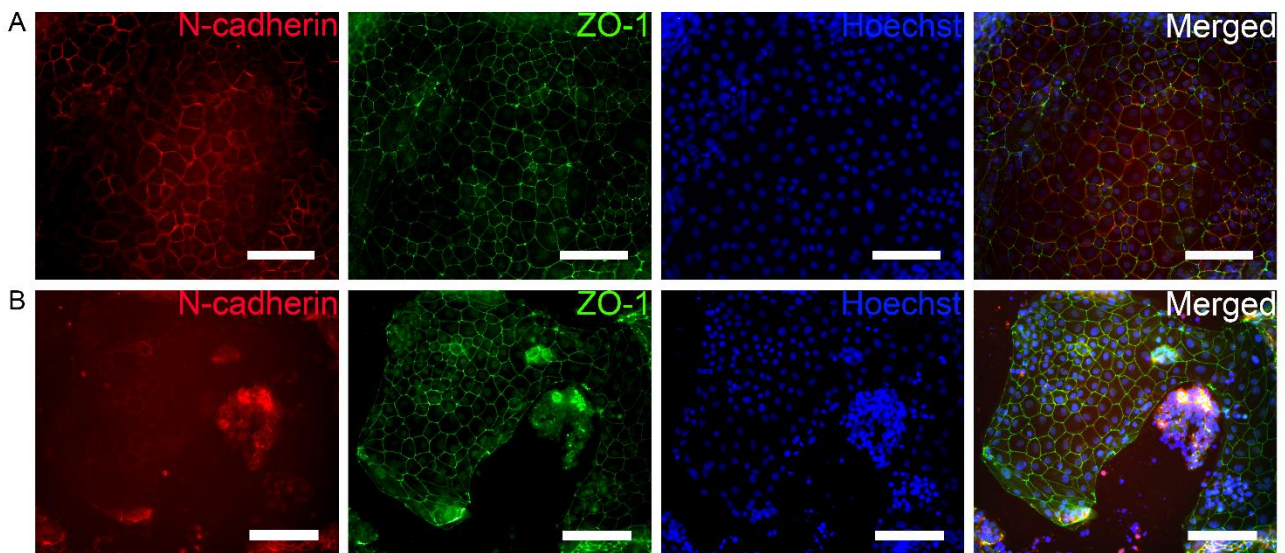

**Supplementary Figure 10.** Structural integrity of hPSC-CEnCs after starvation. Immunofluorescence images of the cells after 6 days of starvation. ZO-1 (green) is localized in tight junctions and N-cadherin (red) in lateral membrane. A) Starvation without medium changes, hESC line Regea08/017 B) Starvation using En medium without KO-SR, hiPSC line AICS-0016-184. Number of biological replicates n=4. Objective magnification 20x. Scale bars 100  $\mu\text{m}$ .



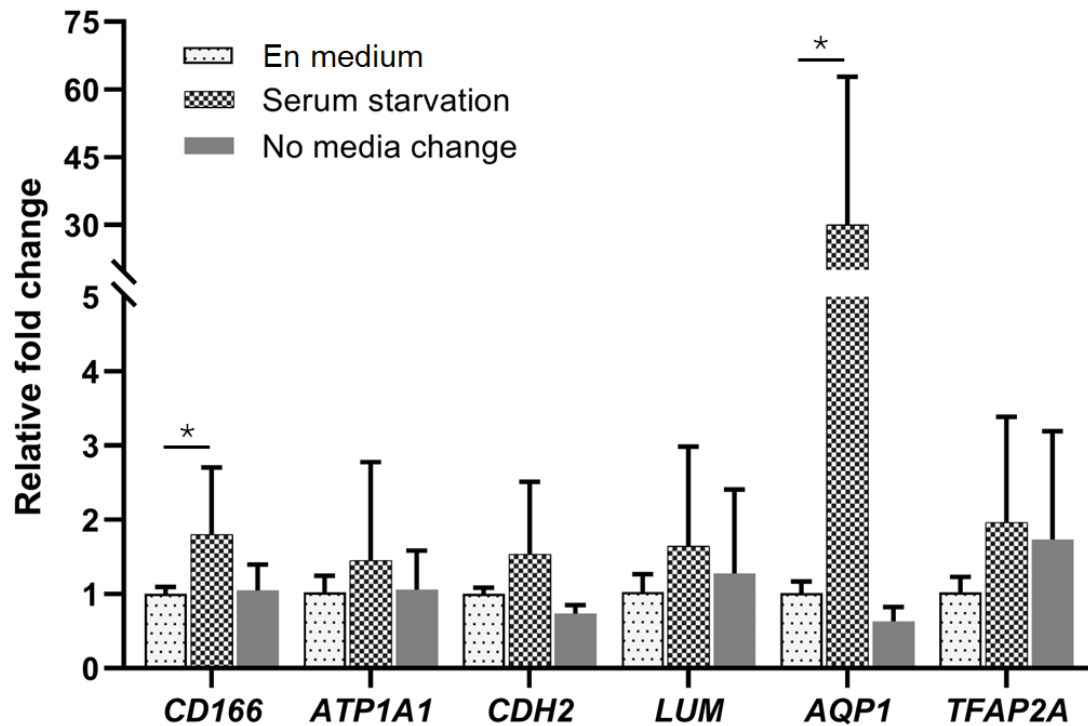

**Supplementary Figure 11.** Gene expression analyses of hPSC-CEnCs under serum starvation and no media change methods were compared to normal En medium changes. The expression of hCEnC markers CD166, ATP1A1, CDH2, and AQP1 was higher in the serum starvation method compared to no media changes, indicating a purification of the cell population. However, only CD166 and AQP1 showed significant differences. LUM exhibited a slight increase in the starvation method, and TFAP2A also increased, suggesting an elevated relative amount of hPSC-CEnCs in the culture. Kruskal-Wallis test was used to compare multiple means with Dunn's correction. Significant relative fold changes were indicated as \* -  $p \leq 0.05$ . Data is represented as the mean relative fold changes of the gene with standard error ( $n=3$ ). Data collected from three biological replicates ( $n=3$ ) using two replicates from Regea08/017 cell lines and one from AICS-0016-184 cell line.

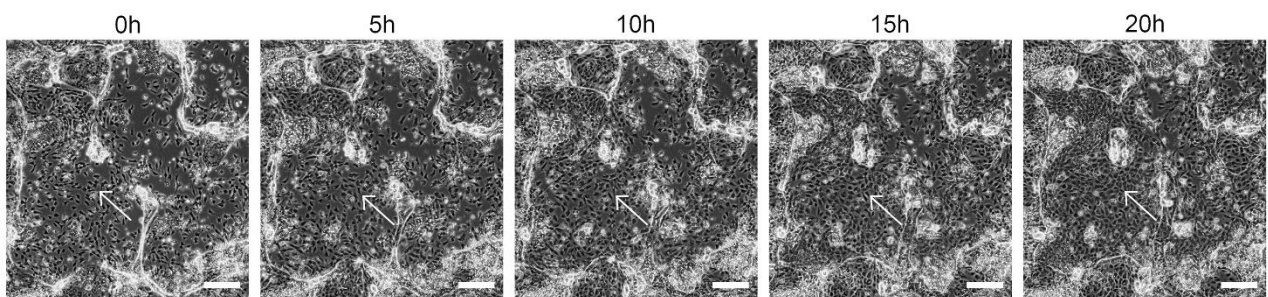

**Supplementary Figure 12.** Timelapse images of post starvation mesenchymal growth in thawed hPSC-CEnC culture. Cells were first cultured 3 days in normal En medium and then being 5 days in medium without KO-SR (serum starvation). Finally, the cells were cultured for two days in normal En medium. The first 20 hours of this period are shown in the time-lapse imaging, with arrows indicating one of the areas where mesenchymal-like cells are proliferating. Data shown is representative images of the hESC differentiated to CEnC-like cells ( $n=3$ ). Objective magnification: 10x. Scale bars 200  $\mu\text{m}$ .



### 1.3. Supplementary Tables

**Supplementary Table 1.** Protein markers to define cell types

|                            |                                                                        |
|----------------------------|------------------------------------------------------------------------|
| hPSC                       | OCT 3/4<br>Nanog                                                       |
| Eye field marker           | PAX6                                                                   |
| Neural crest cells         | AP2a                                                                   |
| Corneal stromal stem cells | CD90                                                                   |
| hPSC-CK                    | Lumican (LUM)<br>Decorin (DCN)<br>Vimentin                             |
| hPSC-CEnC                  | CD166<br>N-Cadherin<br>Na <sup>+</sup> /K <sup>+</sup> -ATPase<br>ZO-1 |

**Supplementary Table 2.** List of antibodies used for immunofluorescence

| Antibody                                                          | Dilution | Catalog/Manufacturer/RRID<br>(Research Resource Identifiers) |
|-------------------------------------------------------------------|----------|--------------------------------------------------------------|
| Zonula occludens-1 (ZO-1)                                         | 1:400    | Cat# 61-7300, Thermo Fisher Scientific, RRID:AB_2533938      |
| Sodium potassium ATPase (Na <sup>+</sup> /K <sup>+</sup> -ATPase) | 1:200    | Cat# ab7671, Abcam, RRID:AB_306023                           |
| Sodium potassium ATPase (Na <sup>+</sup> /K <sup>+</sup> -ATPase) | 1:300    | Cat# 55187-1-AP, Proteintech, RRID:AB_10859261               |
| CD166                                                             | 1:400    | Cat# 559260, BD Biosciences, RRID:AB_397209                  |
| Ki67                                                              | 1:400    | Cat# AB9260, Millipore, RRID:AB_2142366                      |
| Activating enhancer binding protein 2 alpha (AP2α)                | 1:200    | Cat# sc-12726, Santa Cruz Biotechnology, RRID:AB_667767      |
| Lumican (LUM)                                                     | 1:300    | Cat# AF2846, R and D Systems, RRID:AB_2139484                |
| PAX6                                                              | 1:300    | Cat# HPA030775, Sigma-Aldrich, , RRID:AB_10601243            |
| THYmocyte differentiation antigen 1 (Thy-1 or CD90)               | 1:100    | Cat# sc-53456, Santa Cruz Biotechnology, RRID:AB_630308      |
| Decorin (DCN)                                                     | 1:100    | Cat# PA5-13538, Thermo Fisher Scientific, RRID:AB_2090260    |
| Decorin (DCN)                                                     | 1:200    | Cat# 14667-1-AP, Thermo Fisher Scientific, RRID:AB_2090265   |
| Vimentin (VIM)                                                    | 1:300    | Cat# AB1620, Millipore, RRID:AB_90774                        |
| Nanog                                                             | 1:300    | Cat# AF1997, R and D Systems, RRID:AB_355097                 |



|                                                   |       |                                                         |
|---------------------------------------------------|-------|---------------------------------------------------------|
| N-cadherin                                        | 1:300 | Cat# 33-3900, Thermo Fisher Scientific, RRID:AB_2313779 |
| Octamer binding transcription factor 3/4 (OCT3/4) | 1:300 | Cat# AF1759, R and D Systems, RRID:AB_354975            |
| Anti-Mouse IgG Alexa Fluor™ 488                   | 1:800 | Cat# A-21202, Thermo Fisher Scientific, RRID:AB_141607  |
| Anti-Mouse IgG Alexa Fluor™ 568                   | 1:800 | Cat# A10037, Thermo Fisher Scientific, RRID:AB_11180865 |
| Anti-Rabbit IgG Alexa Fluor™ 568                  | 1:800 | Cat# A10042, Thermo Fisher Scientific, RRID:AB_2534017  |
| Anti-Rabbit IgG Alexa Fluor™ 647                  | 1:800 | Cat# A-31573, Thermo Fisher Scientific, RRID:AB_2536183 |
| Anti-Goat IgG Alexa Fluor™ 568                    | 1:800 | Cat# A-11057, Thermo Fisher Scientific, RRID:AB_2534104 |
| Anti-Goat IgG Alexa Fluor® 647                    | 1:800 | Cat# ab150131, Abcam, RRID:AB_2732857                   |

**Supplementary Table 3.** List of primers used for reverse transcription (RT)-PCR and RT-qPCR

| <b>Primers for RT-PCR</b> |                        |                                         |
|---------------------------|------------------------|-----------------------------------------|
| <b>S. No.</b>             | <b>Primer sequence</b> | <b>NCBI Ref Seq_Species_Primer name</b> |
| 1                         | ATCAGGAGTTCCAGTGCTGC   | BC065559.1_Hu_CD90 (Thy-1)_FWD          |
| 2                         | TGGCTTCCCTCTTCACGAAC   | BC065559.1_Hu_CD90 (Thy-1)_REV          |
| 3                         | GTGTGAACTCACCTGGGAG    | BC014271.2_Hu_CD105 (Endoglin)_FWD      |
| 4                         | AGCCATATCCCAGACCCACT   | BC014271.2_Hu_CD105 (Endoglin)_REV      |
| 5                         | CAGCAAGACAACACGTGGTG   | M81104.1_Hu_CD34_FWD                    |
| 6                         | CCCCAAGAACAGCCTCTGAG   | M81104.1_Hu_CD34_REV                    |
| 7                         | TATCCGGTCGCCCATTGATG   | BC065937.1_Hu_CD73_FWD                  |
| 8                         | CTGCAGGAACTCTCCAGTGG   | BC065937.1_Hu_CD73_REV                  |
| 9                         | AGAACAGTCACAGCGGAGTG   | AY047583.1_Hu_PAX6_FWD                  |
| 10                        | GACACCTGCAGAATTCGGGA   | AY047583.1_Hu_PAX6_REV                  |
| 11                        | GCAGGACGAGCTCTACATCC   | BC008892.2_Hu_ALDH3A1_FWD               |
| 12                        | GGTCGAACCTCTCCTTGAGC   | BC008892.2_Hu_ALDH3A1_REV               |
| 13                        | ACTGCCTTGGTGTGTGACAA   | BC093052.1_Hu_aSMA_FWD                  |
| 14                        | TCCCAGTTGGTGATGATGCC   | BC093052.1_Hu_aSMA_REV                  |
| 15                        | TGTTTCTGCCCACCCAGTTT   | AF205403.1_Hu_KERA_FWD                  |
| 16                        | TTCTTCAGCTGGCTTAGGGC   | AF205403.1_Hu_KERA_REV                  |
| 17                        | CCAATGGTGCCTCCTGGAAT   | U18728.1_Hu_LUMI_FWD                    |
| 18                        | AGCTGCAGATCCTCCAGAGA   | U18728.1_Hu_LUMI_REV                    |
| 19                        | CTTGCACAAGTTTCCTGGGC   | BC005322.1_Hu_Decorin_FWD               |



|                                                  |                      |                                     |
|--------------------------------------------------|----------------------|-------------------------------------|
| <b>20</b>                                        | CGAAGATGGCATTGACAGCG | BC005322.1_Hu_Decorin_REV           |
| <b>21</b>                                        | GGACCAGCTAACCAACGACA | BC066956.1_Hu_Vimentin_FWD          |
| <b>22</b>                                        | AAGGTCAAGACGTGCCAGAG | BC066956.1_Hu_Vimentin_REV          |
| <b>23</b>                                        | AGGAGAGAGAGGCTTCCCTG | JQ236861.1_Hu_COL1A1_FWD            |
| <b>24</b>                                        | ACGATCACCACTCTTGCCAG | JQ236861.1_Hu_COL1A1_REV            |
| <b>25</b>                                        | TGCTCTTTGTCTCGGACCAC | AB371583.1_Hu_COL5A1_FWD            |
| <b>26</b>                                        | TCCTTCCCTAGGTCTTCGGG | AB371583.1_Hu_COL5A1_REV            |
| <b>27</b>                                        | GAGAAGGCTGGGGCTCATTT | BC083511.1_Hu_GAPDH_FWD             |
| <b>28</b>                                        | AGTGATGGCATGGACTGTGG | BC083511.1_Hu_GAPDH_REV             |
| <b>TaqMan Gene Expression Assays for RT-qPCR</b> |                      |                                     |
| <b>S. No.</b>                                    | <b>Gene name</b>     | <b>Assay ID (Thermo Scientific)</b> |
| <b>1</b>                                         | <i>KERA</i>          | Hs00559942_m1                       |
| <b>2</b>                                         | <i>LUM</i>           | HS00929860_m1                       |
| <b>3</b>                                         | <i>PAX6</i>          | Hs01088112_m1                       |
| <b>4</b>                                         | <i>ACTA2</i>         | Hs00426835_g1                       |
| <b>5</b>                                         | <i>GAPDH</i>         | Hs99999905_m1                       |
| <b>6</b>                                         | <i>DCN</i>           | Hs00754870_s1                       |
| <b>7</b>                                         | <i>COL1A1</i>        | Hs01076772_gH                       |
| <b>8</b>                                         | <i>ALCAM</i>         | Hs00977641_m1                       |
| <b>9</b>                                         | <i>ATP1A1</i>        | Hs00167556_m1                       |
| <b>10</b>                                        | <i>CDH2</i>          | Hs00983056_m1                       |
| <b>11</b>                                        | <i>AQP1</i>          | Hs01028916_m1                       |
| <b>12</b>                                        | <i>TFAP2A</i>        | Hs01029413_m1                       |
